# Supplementary material for: The rational design of high-performance graphene-based single-atom electrocatalysts for the ORR using machine learning
Source: Royal Society of Chemistry journal article supplement (doi:10.1039/d3cp01224g), 2023-01-01
Supplement: d3cp01224g1.pdf [file d3cp01224g1.pdf]

## Supplementary Information

### **The rational design of high-performance graphene-based single-atom electrocatalysts for ORR using machine learning**

Ziqiang Chen,<sup>a</sup> Hexiang Qi,<sup>a</sup> Haohao Wang,<sup>a</sup> Caiwei Yue,<sup>a</sup> Yangqiu Liu,<sup>a</sup>

Zuoyin Yang,<sup>a\*</sup> Min Pu,<sup>a</sup> Ming Lei<sup>a\*</sup>

State Key Laboratory of Chemical Resource Engineering, Institute of Computational Chemistry, College of Chemistry, Beijing University of Chemical Technology, Beijing 100029, China

\*Email: [leim@mail.buct.edu.cn](mailto:leim@mail.buct.edu.cn) (Ming Lei)

\*Email: [yangzy@mail.buct.edu.cn](mailto:yangzy@mail.buct.edu.cn) (Zuoyin Yang)

## Supplementary Figures

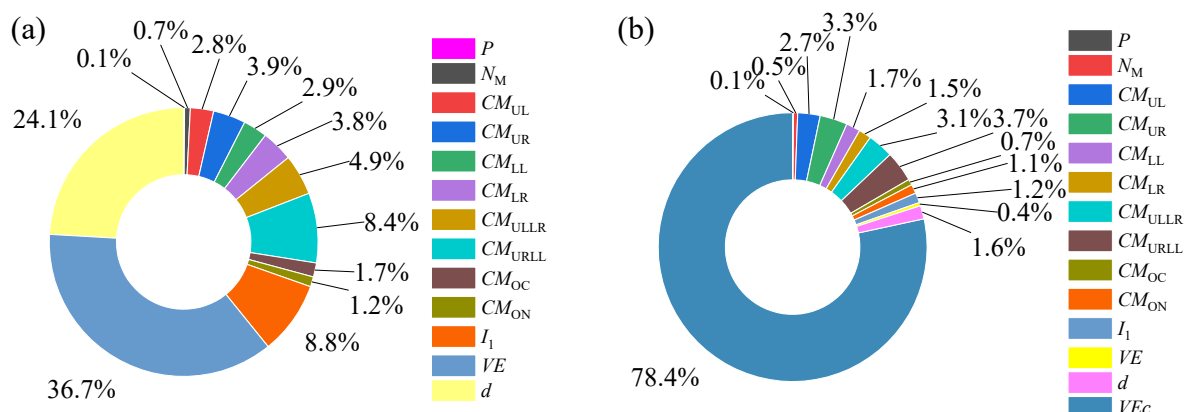

**Figure S1.** The importance of each descriptor in descriptor group that consists of (a) central metal period ( $P$ ), the metal atomic number ( $N_M$ ), Coulomb matrix ( $CM_{UL}$ ,  $CM_{UR}$ ,  $CM_{LL}$ ,  $CM_{LR}$ ,  $CM_{ULLR}$ ,  $CM_{URLL}$ ,  $CM_{OC}$ ,  $CM_{ON}$ ),  $I_1$ , valence electron number ( $VE$ ),  $d$  electron number ( $E_d$ ); (b)  $P$ ,  $N_M$ ,  $CM$  ( $CM_{UL}$ ,  $CM_{UR}$ ,  $CM_{LL}$ ,  $CM_{LR}$ ,  $CM_{ULLR}$ ,  $CM_{URLL}$ ,  $CM_{OC}$ ,  $CM_{ON}$ ),  $I_1$ ,  $VE$ , valence electron correction ( $VEc$ ). Corresponding machine learning (ML) models chose the first two columns of K-dataset which in Table S1 as the dataset. The Random Forest algorithm was chosen as ML algorithm, corresponding hyperparameters was kept default.

## Supplementary Tables

**Table. S1** K-dataset (consist of ZA-MC<sub>4</sub>, ZA-MN<sub>1</sub>C<sub>3</sub>, ZA-MN<sub>2</sub>C<sub>2</sub>, ZA-MN<sub>2</sub>C<sub>2</sub>b, ZA-MN<sub>2</sub>C<sub>2</sub>c, ZA-MN<sub>3</sub>C<sub>1</sub>, ZA-MN<sub>4</sub>). The first two columns are the name of the catalysts and corresponding ORR overpotential ( $\eta_{ORR}$ ) and others columns are the descriptors.

| Catalysts           | $\eta_{ORR}$ | $P$ | $VEc$ | $I_1 * \chi$ | $DC$ | $R_1$ | $R_2$ | $R_3$ | $R_4$ |
|---------------------|--------------|-----|-------|--------------|------|-------|-------|-------|-------|
| ZA-ScC <sub>4</sub> | 2.01         | 4   | 7.8   | 861.02       | 1.34 | 4     | 4     | 5     | 5     |
| ZA-TiC <sub>4</sub> | 2.34         | 4   | 8.8   | 1014.55      | 1.34 | 4     | 4     | 5     | 5     |
| ZA-VC <sub>4</sub>  | 2.61         | 4   | 9.8   | 1060.97      | 1.34 | 4     | 4     | 5     | 5     |

---

|                                    |      |   |      |         |      |   |   |   |   |
|------------------------------------|------|---|------|---------|------|---|---|---|---|
| ZA-CrC <sub>4</sub>                | 2.16 | 4 | 10.8 | 1083.81 | 1.34 | 4 | 4 | 5 | 5 |
| ZA-MnC <sub>4</sub>                | 2.15 | 4 | 11.8 | 1111.82 | 1.34 | 4 | 4 | 5 | 5 |
| ZA-FeC <sub>4</sub>                | 1.27 | 4 | 12.8 | 1395.38 | 1.34 | 4 | 4 | 5 | 5 |
| ZA-CoC <sub>4</sub>                | 1.05 | 4 | 13.8 | 1429.55 | 1.34 | 4 | 4 | 5 | 5 |
| ZA-NiC <sub>4</sub>                | 0.35 | 4 | 14.8 | 1407.86 | 1.34 | 4 | 4 | 5 | 5 |
| ZA-CuC <sub>4</sub>                | 1.13 | 4 | 15.8 | 1416.45 | 1.34 | 4 | 4 | 5 | 5 |
| ZA-ZnC <sub>4</sub>                | 0.84 | 4 | 16.8 | 1495.56 | 1.34 | 4 | 4 | 5 | 5 |
| ZA-YC <sub>4</sub>                 | 1.99 | 5 | 7.8  | 731.88  | 1.34 | 4 | 4 | 5 | 5 |
| ZA-ZrC <sub>4</sub>                | 2.25 | 5 | 8.8  | 851.33  | 1.34 | 4 | 4 | 5 | 5 |
| ZA-NbC <sub>4</sub>                | 2.78 | 5 | 9.8  | 1043.36 | 1.34 | 4 | 4 | 5 | 5 |
| ZA-MoC <sub>4</sub>                | 2.50 | 5 | 10.8 | 1478.09 | 1.34 | 4 | 4 | 5 | 5 |
| ZA-TcC <sub>4</sub>                | 1.86 | 5 | 11.8 | 1475.04 | 1.34 | 4 | 4 | 5 | 5 |
| ZA-RuC <sub>4</sub>                | 1.57 | 5 | 12.8 | 1562.44 | 1.34 | 4 | 4 | 5 | 5 |
| ZA-RhC <sub>4</sub>                | 1.29 | 5 | 13.8 | 1640.92 | 1.34 | 4 | 4 | 5 | 5 |
| ZA-PdC <sub>4</sub>                | 0.33 | 5 | 14.8 | 1769.68 | 1.34 | 4 | 4 | 5 | 5 |
| ZA-AgC <sub>4</sub>                | 0.96 | 5 | 15.8 | 1410.83 | 1.34 | 4 | 4 | 5 | 5 |
| ZA-CdC <sub>4</sub>                | 0.59 | 5 | 16.8 | 1466.58 | 1.34 | 4 | 4 | 5 | 5 |
| ZA-LaC <sub>4</sub>                | 1.80 | 6 | 7.8  | 591.91  | 1.34 | 4 | 4 | 5 | 5 |
| ZA-HfC <sub>4</sub>                | 2.66 | 6 | 8.8  | 856.05  | 1.34 | 4 | 4 | 5 | 5 |
| ZA-TaC <sub>4</sub>                | 3.30 | 6 | 9.8  | 1092.60 | 1.34 | 4 | 4 | 5 | 5 |
| ZA-WC <sub>4</sub>                 | 2.90 | 6 | 10.8 | 1289.96 | 1.34 | 4 | 4 | 5 | 5 |
| ZA-ReC <sub>4</sub>                | 1.29 | 6 | 11.8 | 1436.02 | 1.34 | 4 | 4 | 5 | 5 |
| ZA-OsC <sub>4</sub>                | 1.22 | 6 | 12.8 | 1791.24 | 1.34 | 4 | 4 | 5 | 5 |
| ZA-IrC <sub>4</sub>                | 1.69 | 6 | 13.8 | 1903.44 | 1.34 | 4 | 4 | 5 | 5 |
| ZA-PtC <sub>4</sub>                | 0.54 | 6 | 14.8 | 1901.68 | 1.34 | 4 | 4 | 5 | 5 |
| ZA-AuC <sub>4</sub>                | 1.11 | 6 | 15.8 | 2136.24 | 1.34 | 4 | 4 | 5 | 5 |
| ZA-HgC <sub>4</sub>                | 0.90 | 6 | 16.8 | 1913.49 | 1.34 | 4 | 4 | 5 | 5 |
| ZA-ScN <sub>1</sub> C <sub>3</sub> | 1.86 | 4 | 8    | 861.02  | 0.81 | 4 | 5 | 5 | 6 |

---

|                                    |      |   |    |         |      |   |   |   |   |
|------------------------------------|------|---|----|---------|------|---|---|---|---|
| ZA-TiN <sub>1</sub> C <sub>3</sub> | 2.82 | 4 | 9  | 1014.55 | 0.81 | 4 | 5 | 5 | 6 |
| ZA-VN <sub>1</sub> C <sub>3</sub>  | 2.69 | 4 | 10 | 1060.97 | 0.81 | 4 | 5 | 5 | 6 |
| ZA-CrN <sub>1</sub> C <sub>3</sub> | 2.32 | 4 | 11 | 1083.81 | 0.81 | 4 | 5 | 5 | 6 |
| ZA-MnN <sub>1</sub> C <sub>3</sub> | 1.38 | 4 | 12 | 1111.82 | 0.81 | 4 | 5 | 5 | 6 |
| ZA-FeN <sub>1</sub> C <sub>3</sub> | 1.05 | 4 | 13 | 1395.38 | 0.81 | 4 | 5 | 5 | 6 |
| ZA-CoN <sub>1</sub> C <sub>3</sub> | 1.02 | 4 | 14 | 1429.55 | 0.81 | 4 | 5 | 5 | 6 |
| ZA-NiN <sub>1</sub> C <sub>3</sub> | 0.49 | 4 | 15 | 1407.86 | 0.81 | 4 | 5 | 5 | 6 |
| ZA-CuN <sub>1</sub> C <sub>3</sub> | 1.17 | 4 | 16 | 1416.45 | 0.81 | 4 | 5 | 5 | 6 |
| ZA-ZnN <sub>1</sub> C <sub>3</sub> | 0.46 | 4 | 17 | 1495.56 | 0.81 | 4 | 5 | 5 | 6 |
| ZA-YN <sub>1</sub> C <sub>3</sub>  | 1.88 | 5 | 8  | 731.88  | 0.81 | 4 | 5 | 5 | 6 |
| ZA-ZrN <sub>1</sub> C <sub>3</sub> | 2.76 | 5 | 9  | 851.33  | 0.81 | 4 | 5 | 5 | 6 |
| ZA-NbN <sub>1</sub> C <sub>3</sub> | 2.82 | 5 | 10 | 1043.36 | 0.81 | 4 | 5 | 5 | 6 |
| ZA-MoN <sub>1</sub> C <sub>3</sub> | 2.57 | 5 | 11 | 1478.09 | 0.81 | 4 | 5 | 5 | 6 |
| ZA-TcN <sub>1</sub> C <sub>3</sub> | 1.58 | 5 | 12 | 1475.04 | 0.81 | 4 | 5 | 5 | 6 |
| ZA-RuN <sub>1</sub> C <sub>3</sub> | 2.11 | 5 | 13 | 1562.44 | 0.81 | 4 | 5 | 5 | 6 |
| ZA-RhN <sub>1</sub> C <sub>3</sub> | 0.81 | 5 | 14 | 1640.92 | 0.81 | 4 | 5 | 5 | 6 |
| ZA-PdN <sub>1</sub> C <sub>3</sub> | 0.35 | 5 | 15 | 1769.68 | 0.81 | 4 | 5 | 5 | 6 |
| ZA-AgN <sub>1</sub> C <sub>3</sub> | 1.14 | 5 | 16 | 1410.83 | 0.81 | 4 | 5 | 5 | 6 |
| ZA-CdN <sub>1</sub> C <sub>3</sub> | 1.05 | 5 | 17 | 1466.58 | 0.81 | 4 | 5 | 5 | 6 |
| ZA-LaN <sub>1</sub> C <sub>3</sub> | 1.62 | 6 | 8  | 591.91  | 0.81 | 4 | 5 | 5 | 6 |
| ZA-HfN <sub>1</sub> C <sub>3</sub> | 3.20 | 6 | 9  | 856.05  | 0.81 | 4 | 5 | 5 | 6 |
| ZA-TaN <sub>1</sub> C <sub>3</sub> | 3.39 | 6 | 10 | 1092.60 | 0.81 | 4 | 5 | 5 | 6 |
| ZA-WN <sub>1</sub> C <sub>3</sub>  | 3.10 | 6 | 11 | 1289.96 | 0.81 | 4 | 5 | 5 | 6 |
| ZA-ReN <sub>1</sub> C <sub>3</sub> | 2.12 | 6 | 12 | 1436.02 | 0.81 | 4 | 5 | 5 | 6 |
| ZA-OsN <sub>1</sub> C <sub>3</sub> | 1.05 | 6 | 13 | 1791.24 | 0.81 | 4 | 5 | 5 | 6 |
| ZA-IrN <sub>1</sub> C <sub>3</sub> | 1.13 | 6 | 14 | 1903.44 | 0.81 | 4 | 5 | 5 | 6 |
| ZA-PtN <sub>1</sub> C <sub>3</sub> | 0.38 | 6 | 15 | 1901.68 | 0.81 | 4 | 5 | 5 | 6 |
| ZA-AuN <sub>1</sub> C <sub>3</sub> | 1.19 | 6 | 16 | 2136.24 | 0.81 | 4 | 5 | 5 | 6 |

---

|                                    |      |   |      |         |      |   |   |   |   |
|------------------------------------|------|---|------|---------|------|---|---|---|---|
| ZA-HgN <sub>1</sub> C <sub>3</sub> | 0.62 | 6 | 17   | 1913.49 | 0.81 | 4 | 5 | 5 | 6 |
| ZA-ScN <sub>2</sub> C <sub>2</sub> | 2.15 | 4 | 8.2  | 861.02  | 0.37 | 5 | 5 | 6 | 6 |
| ZA-TiN <sub>2</sub> C <sub>2</sub> | 2.97 | 4 | 9.2  | 1014.55 | 0.37 | 5 | 5 | 6 | 6 |
| ZA-VN <sub>2</sub> C <sub>2</sub>  | 2.84 | 4 | 10.2 | 1060.97 | 0.37 | 5 | 5 | 6 | 6 |
| ZA-CrN <sub>2</sub> C <sub>2</sub> | 2.06 | 4 | 11.2 | 1083.81 | 0.37 | 5 | 5 | 6 | 6 |
| ZA-MnN <sub>2</sub> C <sub>2</sub> | 1.34 | 4 | 12.2 | 1111.82 | 0.37 | 5 | 5 | 6 | 6 |
| ZA-FeN <sub>2</sub> C <sub>2</sub> | 1.21 | 4 | 13.2 | 1395.38 | 0.37 | 5 | 5 | 6 | 6 |
| ZA-CoN <sub>2</sub> C <sub>2</sub> | 0.68 | 4 | 14.2 | 1429.55 | 0.37 | 5 | 5 | 6 | 6 |
| ZA-NiN <sub>2</sub> C <sub>2</sub> | 0.75 | 4 | 15.2 | 1407.86 | 0.37 | 5 | 5 | 6 | 6 |
| ZA-CuN <sub>2</sub> C <sub>2</sub> | 0.93 | 4 | 16.2 | 1416.45 | 0.37 | 5 | 5 | 6 | 6 |
| ZA-ZnN <sub>2</sub> C <sub>2</sub> | 0.83 | 4 | 17.2 | 1495.56 | 0.37 | 5 | 5 | 6 | 6 |
| ZA-YN <sub>2</sub> C <sub>2</sub>  | 1.99 | 5 | 8.2  | 731.88  | 0.37 | 5 | 5 | 6 | 6 |
| ZA-ZrN <sub>2</sub> C <sub>2</sub> | 2.93 | 5 | 9.2  | 851.33  | 0.37 | 5 | 5 | 6 | 6 |
| ZA-NbN <sub>2</sub> C <sub>2</sub> | 3.35 | 5 | 10.2 | 1043.36 | 0.37 | 5 | 5 | 6 | 6 |
| ZA-MoN <sub>2</sub> C <sub>2</sub> | 1.73 | 5 | 11.2 | 1478.09 | 0.37 | 5 | 5 | 6 | 6 |
| ZA-TcN <sub>2</sub> C <sub>2</sub> | 1.02 | 5 | 12.2 | 1475.04 | 0.37 | 5 | 5 | 6 | 6 |
| ZA-RuN <sub>2</sub> C <sub>2</sub> | 1.00 | 5 | 13.2 | 1562.44 | 0.37 | 5 | 5 | 6 | 6 |
| ZA-RhN <sub>2</sub> C <sub>2</sub> | 0.92 | 5 | 14.2 | 1640.92 | 0.37 | 5 | 5 | 6 | 6 |
| ZA-PdN <sub>2</sub> C <sub>2</sub> | 0.83 | 5 | 15.2 | 1769.68 | 0.37 | 5 | 5 | 6 | 6 |
| ZA-AgN <sub>2</sub> C <sub>2</sub> | 1.05 | 5 | 16.2 | 1410.83 | 0.37 | 5 | 5 | 6 | 6 |
| ZA-CdN <sub>2</sub> C <sub>2</sub> | 0.46 | 5 | 17.2 | 1466.58 | 0.37 | 5 | 5 | 6 | 6 |
| ZA-LaN <sub>2</sub> C <sub>2</sub> | 1.54 | 6 | 8.2  | 591.91  | 0.37 | 5 | 5 | 6 | 6 |
| ZA-HfN <sub>2</sub> C <sub>2</sub> | 3.37 | 6 | 9.2  | 856.05  | 0.37 | 5 | 5 | 6 | 6 |
| ZA-TaN <sub>2</sub> C <sub>2</sub> | 1.34 | 6 | 10.2 | 1092.60 | 0.37 | 5 | 5 | 6 | 6 |
| ZA-WN <sub>2</sub> C <sub>2</sub>  | 1.89 | 6 | 11.2 | 1289.96 | 0.37 | 5 | 5 | 6 | 6 |
| ZA-ReN <sub>2</sub> C <sub>2</sub> | 0.40 | 6 | 12.2 | 1436.02 | 0.37 | 5 | 5 | 6 | 6 |
| ZA-OsN <sub>2</sub> C <sub>2</sub> | 0.82 | 6 | 13.2 | 1791.24 | 0.37 | 5 | 5 | 6 | 6 |
| ZA-IrN <sub>2</sub> C <sub>2</sub> | 1.17 | 6 | 14.2 | 1903.44 | 0.37 | 5 | 5 | 6 | 6 |

---

|                                      |      |   |      |         |      |   |   |   |   |
|--------------------------------------|------|---|------|---------|------|---|---|---|---|
| ZA-PtN <sub>2</sub> C <sub>2</sub>   | 0.76 | 6 | 15.2 | 1901.68 | 0.37 | 5 | 5 | 6 | 6 |
| ZA-AuN <sub>2</sub> C <sub>2</sub>   | 1.17 | 6 | 16.2 | 2136.24 | 0.37 | 5 | 5 | 6 | 6 |
| ZA-HgN <sub>2</sub> C <sub>2</sub>   | 1.52 | 6 | 17.2 | 1913.49 | 0.37 | 5 | 5 | 6 | 6 |
| ZA-ScN <sub>2</sub> C <sub>2</sub> b | 2.13 | 4 | 8.2  | 861.02  | 0.37 | 4 | 6 | 6 | 6 |
| ZA-TiN <sub>2</sub> C <sub>2</sub> b | 2.96 | 4 | 9.2  | 1014.55 | 0.37 | 4 | 6 | 6 | 6 |
| ZA-VN <sub>2</sub> C <sub>2</sub> b  | 1.78 | 4 | 10.2 | 1060.97 | 0.37 | 4 | 6 | 6 | 6 |
| ZA-CrN <sub>2</sub> C <sub>2</sub> b | 1.14 | 4 | 11.2 | 1083.81 | 0.37 | 4 | 6 | 6 | 6 |
| ZA-MnN <sub>2</sub> C <sub>2</sub> b | 1.15 | 4 | 12.2 | 1111.82 | 0.37 | 4 | 6 | 6 | 6 |
| ZA-FeN <sub>2</sub> C <sub>2</sub> b | 0.96 | 4 | 13.2 | 1395.38 | 0.37 | 4 | 6 | 6 | 6 |
| ZA-CoN <sub>2</sub> C <sub>2</sub> b | 0.62 | 4 | 14.2 | 1429.55 | 0.37 | 4 | 6 | 6 | 6 |
| ZA-NiN <sub>2</sub> C <sub>2</sub> b | 0.78 | 4 | 15.2 | 1407.86 | 0.37 | 4 | 6 | 6 | 6 |
| ZA-CuN <sub>2</sub> C <sub>2</sub> b | 0.99 | 4 | 16.2 | 1416.45 | 0.37 | 4 | 6 | 6 | 6 |
| ZA-ZnN <sub>2</sub> C <sub>2</sub> b | 0.41 | 4 | 17.2 | 1495.56 | 0.37 | 4 | 6 | 6 | 6 |
| ZA-YN <sub>2</sub> C <sub>2</sub> b  | 2.01 | 5 | 8.2  | 731.88  | 0.37 | 4 | 6 | 6 | 6 |
| ZA-ZrN <sub>2</sub> C <sub>2</sub> b | 2.96 | 5 | 9.2  | 851.33  | 0.37 | 4 | 6 | 6 | 6 |
| ZA-NbN <sub>2</sub> C <sub>2</sub> b | 3.30 | 5 | 10.2 | 1043.36 | 0.37 | 4 | 6 | 6 | 6 |
| ZA-MoN <sub>2</sub> C <sub>2</sub> b | 1.67 | 5 | 11.2 | 1478.09 | 0.37 | 4 | 6 | 6 | 6 |
| ZA-TcN <sub>2</sub> C <sub>2</sub> b | 1.18 | 5 | 12.2 | 1475.04 | 0.37 | 4 | 6 | 6 | 6 |
| ZA-RuN <sub>2</sub> C <sub>2</sub> b | 0.54 | 5 | 13.2 | 1562.44 | 0.37 | 4 | 6 | 6 | 6 |
| ZA-RhN <sub>2</sub> C <sub>2</sub> b | 0.90 | 5 | 14.2 | 1640.92 | 0.37 | 4 | 6 | 6 | 6 |
| ZA-PdN <sub>2</sub> C <sub>2</sub> b | 1.01 | 5 | 15.2 | 1769.68 | 0.37 | 4 | 6 | 6 | 6 |
| ZA-AgN <sub>2</sub> C <sub>2</sub> b | 1.13 | 5 | 16.2 | 1410.83 | 0.37 | 4 | 6 | 6 | 6 |
| ZA-CdN <sub>2</sub> C <sub>2</sub> b | 1.03 | 5 | 17.2 | 1466.58 | 0.37 | 4 | 6 | 6 | 6 |
| ZA-LaN <sub>2</sub> C <sub>2</sub> b | 1.58 | 6 | 8.2  | 591.91  | 0.37 | 4 | 6 | 6 | 6 |
| ZA-HfN <sub>2</sub> C <sub>2</sub> b | 3.41 | 6 | 9.2  | 856.05  | 0.37 | 4 | 6 | 6 | 6 |
| ZA-TaN <sub>2</sub> C <sub>2</sub> b | 1.48 | 6 | 10.2 | 1092.60 | 0.37 | 4 | 6 | 6 | 6 |
| ZA-WN <sub>2</sub> C <sub>2</sub> b  | 1.69 | 6 | 11.2 | 1289.96 | 0.37 | 4 | 6 | 6 | 6 |
| ZA-ReN <sub>2</sub> C <sub>2</sub> b | 1.22 | 6 | 12.2 | 1436.02 | 0.37 | 4 | 6 | 6 | 6 |

---

|                                      |      |   |      |         |      |   |   |   |   |
|--------------------------------------|------|---|------|---------|------|---|---|---|---|
| ZA-OsN <sub>2</sub> C <sub>2</sub> b | 1.18 | 6 | 13.2 | 1791.24 | 0.37 | 4 | 6 | 6 | 6 |
| ZA-IrN <sub>2</sub> C <sub>2</sub> b | 0.92 | 6 | 14.2 | 1903.44 | 0.37 | 4 | 6 | 6 | 6 |
| ZA-PtN <sub>2</sub> C <sub>2</sub> b | 1.10 | 6 | 15.2 | 1901.68 | 0.37 | 4 | 6 | 6 | 6 |
| ZA-AuN <sub>2</sub> C <sub>2</sub> b | 1.18 | 6 | 16.2 | 2136.24 | 0.37 | 4 | 6 | 6 | 6 |
| ZA-ScN <sub>2</sub> C <sub>2</sub> c | 2.34 | 4 | 8.2  | 861.02  | 0.74 | 5 | 5 | 5 | 7 |
| ZA-TiN <sub>2</sub> C <sub>2</sub> c | 2.95 | 4 | 9.2  | 1014.55 | 0.74 | 5 | 5 | 5 | 7 |
| ZA-VN <sub>2</sub> C <sub>2</sub> c  | 1.37 | 4 | 10.2 | 1060.97 | 0.74 | 5 | 5 | 5 | 7 |
| ZA-CrN <sub>2</sub> C <sub>2</sub> c | 0.94 | 4 | 11.2 | 1083.81 | 0.74 | 5 | 5 | 5 | 7 |
| ZA-MnN <sub>2</sub> C <sub>2</sub> c | 1.18 | 4 | 12.2 | 1111.82 | 0.74 | 5 | 5 | 5 | 7 |
| ZA-FeN <sub>2</sub> C <sub>2</sub> c | 0.64 | 4 | 13.2 | 1395.38 | 0.74 | 5 | 5 | 5 | 7 |
| ZA-CoN <sub>2</sub> C <sub>2</sub> c | 0.74 | 4 | 14.2 | 1429.55 | 0.74 | 5 | 5 | 5 | 7 |
| ZA-NiN <sub>2</sub> C <sub>2</sub> c | 0.74 | 4 | 15.2 | 1407.86 | 0.74 | 5 | 5 | 5 | 7 |
| ZA-CuN <sub>2</sub> C <sub>2</sub> c | 0.94 | 4 | 16.2 | 1416.45 | 0.74 | 5 | 5 | 5 | 7 |
| ZA-ZnN <sub>2</sub> C <sub>2</sub> c | 1.97 | 4 | 17.2 | 1495.56 | 0.74 | 5 | 5 | 5 | 7 |
| ZA-YN <sub>2</sub> C <sub>2</sub> c  | 2.26 | 5 | 8.2  | 731.88  | 0.74 | 5 | 5 | 5 | 7 |
| ZA-ZrN <sub>2</sub> C <sub>2</sub> c | 2.99 | 5 | 9.2  | 851.33  | 0.74 | 5 | 5 | 5 | 7 |
| ZA-NbN <sub>2</sub> C <sub>2</sub> c | 1.31 | 5 | 10.2 | 1043.36 | 0.74 | 5 | 5 | 5 | 7 |
| ZA-MoN <sub>2</sub> C <sub>2</sub> c | 1.33 | 5 | 11.2 | 1478.09 | 0.74 | 5 | 5 | 5 | 7 |
| ZA-TcN <sub>2</sub> C <sub>2</sub> c | 1.16 | 5 | 12.2 | 1475.04 | 0.74 | 5 | 5 | 5 | 7 |
| ZA-RuN <sub>2</sub> C <sub>2</sub> c | 0.70 | 5 | 13.2 | 1562.44 | 0.74 | 5 | 5 | 5 | 7 |
| ZA-RhN <sub>2</sub> C <sub>2</sub> c | 0.80 | 5 | 14.2 | 1640.92 | 0.74 | 5 | 5 | 5 | 7 |
| ZA-PdN <sub>2</sub> C <sub>2</sub> c | 1.02 | 5 | 15.2 | 1769.68 | 0.74 | 5 | 5 | 5 | 7 |
| ZA-AgN <sub>2</sub> C <sub>2</sub> c | 1.03 | 5 | 16.2 | 1410.83 | 0.74 | 5 | 5 | 5 | 7 |
| ZA-CdN <sub>2</sub> C <sub>2</sub> c | 1.12 | 5 | 17.2 | 1466.58 | 0.74 | 5 | 5 | 5 | 7 |
| ZA-LaN <sub>2</sub> C <sub>2</sub> c | 1.82 | 6 | 8.2  | 591.91  | 0.74 | 5 | 5 | 5 | 7 |
| ZA-HfN <sub>2</sub> C <sub>2</sub> c | 3.46 | 6 | 9.2  | 856.05  | 0.74 | 5 | 5 | 5 | 7 |
| ZA-TaN <sub>2</sub> C <sub>2</sub> c | 3.76 | 6 | 10.2 | 1092.60 | 0.74 | 5 | 5 | 5 | 7 |
| ZA-WN <sub>2</sub> C <sub>2</sub> c  | 1.20 | 6 | 11.2 | 1289.96 | 0.74 | 5 | 5 | 5 | 7 |

---

|                                     |      |   |      |         |      |   |   |   |   |
|-------------------------------------|------|---|------|---------|------|---|---|---|---|
| ZA-ReN <sub>2</sub> C <sub>2c</sub> | 1.35 | 6 | 12.2 | 1436.02 | 0.74 | 5 | 5 | 5 | 7 |
| ZA-OsN <sub>2</sub> C <sub>2c</sub> | 1.28 | 6 | 13.2 | 1791.24 | 0.74 | 5 | 5 | 5 | 7 |
| ZA-IrN <sub>2</sub> C <sub>2c</sub> | 1.28 | 6 | 14.2 | 1903.44 | 0.74 | 5 | 5 | 5 | 7 |
| ZA-PtN <sub>2</sub> C <sub>2c</sub> | 1.07 | 6 | 15.2 | 1901.68 | 0.74 | 5 | 5 | 5 | 7 |
| ZA-AuN <sub>2</sub> C <sub>2c</sub> | 1.12 | 6 | 16.2 | 2136.24 | 0.74 | 5 | 5 | 5 | 7 |
| ZA-HgN <sub>2</sub> C <sub>2c</sub> | 0.90 | 6 | 17.2 | 1913.49 | 0.74 | 5 | 5 | 5 | 7 |
| ZA-ScN <sub>3</sub> C <sub>1</sub>  | 2.48 | 4 | 8.4  | 861.02  | 0.34 | 5 | 6 | 6 | 7 |
| ZA-TiN <sub>3</sub> C <sub>1</sub>  | 3.36 | 4 | 9.4  | 1014.55 | 0.34 | 5 | 6 | 6 | 7 |
| ZA-VN <sub>3</sub> C <sub>1</sub>   | 2.98 | 4 | 10.4 | 1060.97 | 0.34 | 5 | 6 | 6 | 7 |
| ZA-CrN <sub>3</sub> C <sub>1</sub>  | 1.90 | 4 | 11.4 | 1083.81 | 0.34 | 5 | 6 | 6 | 7 |
| ZA-MnN <sub>3</sub> C <sub>1</sub>  | 1.26 | 4 | 12.4 | 1111.82 | 0.34 | 5 | 6 | 6 | 7 |
| ZA-FeN <sub>3</sub> C <sub>1</sub>  | 1.04 | 4 | 13.4 | 1395.38 | 0.34 | 5 | 6 | 6 | 7 |
| ZA-CoN <sub>3</sub> C <sub>1</sub>  | 0.46 | 4 | 14.4 | 1429.55 | 0.34 | 5 | 6 | 6 | 7 |
| ZA-NiN <sub>3</sub> C <sub>1</sub>  | 0.76 | 4 | 15.4 | 1407.86 | 0.34 | 5 | 6 | 6 | 7 |
| ZA-CuN <sub>3</sub> C <sub>1</sub>  | 0.95 | 4 | 16.4 | 1416.45 | 0.34 | 5 | 6 | 6 | 7 |
| ZA-ZnN <sub>3</sub> C <sub>1</sub>  | 0.54 | 4 | 17.4 | 1495.56 | 0.34 | 5 | 6 | 6 | 7 |
| ZA-YN <sub>3</sub> C <sub>1</sub>   | 2.35 | 5 | 8.4  | 731.88  | 0.34 | 5 | 6 | 6 | 7 |
| ZA-ZrN <sub>3</sub> C <sub>1</sub>  | 3.56 | 5 | 9.4  | 851.33  | 0.34 | 5 | 6 | 6 | 7 |
| ZA-NbN <sub>3</sub> C <sub>1</sub>  | 1.82 | 5 | 10.4 | 1043.36 | 0.34 | 5 | 6 | 6 | 7 |
| ZA-MoN <sub>3</sub> C <sub>1</sub>  | 1.50 | 5 | 11.4 | 1478.09 | 0.34 | 5 | 6 | 6 | 7 |
| ZA-TcN <sub>3</sub> C <sub>1</sub>  | 1.03 | 5 | 12.4 | 1475.04 | 0.34 | 5 | 6 | 6 | 7 |
| ZA-RuN <sub>3</sub> C <sub>1</sub>  | 0.40 | 5 | 13.4 | 1562.44 | 0.34 | 5 | 6 | 6 | 7 |
| ZA-RhN <sub>3</sub> C <sub>1</sub>  | 0.42 | 5 | 14.4 | 1640.92 | 0.34 | 5 | 6 | 6 | 7 |
| ZA-PdN <sub>3</sub> C <sub>1</sub>  | 1.09 | 5 | 15.4 | 1769.68 | 0.34 | 5 | 6 | 6 | 7 |
| ZA-AgN <sub>3</sub> C <sub>1</sub>  | 1.05 | 5 | 16.4 | 1410.83 | 0.34 | 5 | 6 | 6 | 7 |
| ZA-CdN <sub>3</sub> C <sub>1</sub>  | 1.13 | 5 | 17.4 | 1466.58 | 0.34 | 5 | 6 | 6 | 7 |
| ZA-LaN <sub>3</sub> C <sub>1</sub>  | 1.91 | 6 | 8.4  | 591.91  | 0.34 | 5 | 6 | 6 | 7 |
| ZA-HfN <sub>3</sub> C <sub>1</sub>  | 3.88 | 6 | 9.4  | 856.05  | 0.34 | 5 | 6 | 6 | 7 |



---

|                                    |      |   |      |         |      |   |   |   |   |
|------------------------------------|------|---|------|---------|------|---|---|---|---|
| ZA-TaN <sub>3</sub> C <sub>1</sub> | 1.67 | 6 | 10.4 | 1092.60 | 0.34 | 5 | 6 | 6 | 7 |
| ZA-WN <sub>3</sub> C <sub>1</sub>  | 1.43 | 6 | 11.4 | 1289.96 | 0.34 | 5 | 6 | 6 | 7 |
| ZA-ReN <sub>3</sub> C <sub>1</sub> | 1.48 | 6 | 12.4 | 1436.02 | 0.34 | 5 | 6 | 6 | 7 |
| ZA-OsN <sub>3</sub> C <sub>1</sub> | 0.92 | 6 | 13.4 | 1791.24 | 0.34 | 5 | 6 | 6 | 7 |
| ZA-IrN <sub>3</sub> C <sub>1</sub> | 0.54 | 6 | 14.4 | 1903.44 | 0.34 | 5 | 6 | 6 | 7 |
| ZA-PtN <sub>3</sub> C <sub>1</sub> | 1.10 | 6 | 15.4 | 1901.68 | 0.34 | 5 | 6 | 6 | 7 |
| ZA-AuN <sub>3</sub> C <sub>1</sub> | 1.13 | 6 | 16.4 | 2136.24 | 0.34 | 5 | 6 | 6 | 7 |
| ZA-ScN <sub>4</sub>                | 3.21 | 4 | 8.6  | 861.02  | 0.31 | 6 | 6 | 7 | 7 |
| ZA-TiN <sub>4</sub>                | 3.32 | 4 | 9.6  | 1014.55 | 0.31 | 6 | 6 | 7 | 7 |
| ZA-VN <sub>4</sub>                 | 0.83 | 4 | 10.6 | 1060.97 | 0.31 | 6 | 6 | 7 | 7 |
| ZA-CrN <sub>4</sub>                | 1.40 | 4 | 11.6 | 1083.81 | 0.31 | 6 | 6 | 7 | 7 |
| ZA-MnN <sub>4</sub>                | 0.86 | 4 | 12.6 | 1111.82 | 0.31 | 6 | 6 | 7 | 7 |
| ZA-FeN <sub>4</sub>                | 0.67 | 4 | 13.6 | 1395.38 | 0.31 | 6 | 6 | 7 | 7 |
| ZA-CoN <sub>4</sub>                | 0.39 | 4 | 14.6 | 1429.55 | 0.31 | 6 | 6 | 7 | 7 |
| ZA-NiN <sub>4</sub>                | 1.02 | 4 | 15.6 | 1407.86 | 0.31 | 6 | 6 | 7 | 7 |
| ZA-CuN <sub>4</sub>                | 0.95 | 4 | 16.6 | 1416.45 | 0.31 | 6 | 6 | 7 | 7 |
| ZA-ZnN <sub>4</sub>                | 0.67 | 4 | 17.6 | 1495.56 | 0.31 | 6 | 6 | 7 | 7 |
| ZA-YN <sub>4</sub>                 | 3.08 | 5 | 8.6  | 731.88  | 0.31 | 6 | 6 | 7 | 7 |
| ZA-ZrN <sub>4</sub>                | 3.80 | 5 | 9.6  | 851.33  | 0.31 | 6 | 6 | 7 | 7 |
| ZA-NbN <sub>4</sub>                | 1.39 | 5 | 10.6 | 1043.36 | 0.31 | 6 | 6 | 7 | 7 |
| ZA-MoN <sub>4</sub>                | 0.50 | 5 | 11.6 | 1478.09 | 0.31 | 6 | 6 | 7 | 7 |
| ZA-TcN <sub>4</sub>                | 0.66 | 5 | 12.6 | 1475.04 | 0.31 | 6 | 6 | 7 | 7 |
| ZA-RuN <sub>4</sub>                | 0.94 | 5 | 13.6 | 1562.44 | 0.31 | 6 | 6 | 7 | 7 |
| ZA-RhN <sub>4</sub>                | 0.27 | 5 | 14.6 | 1640.92 | 0.31 | 6 | 6 | 7 | 7 |
| ZA-PdN <sub>4</sub>                | 1.19 | 5 | 15.6 | 1769.68 | 0.31 | 6 | 6 | 7 | 7 |
| ZA-AgN <sub>4</sub>                | 0.53 | 5 | 16.6 | 1410.83 | 0.31 | 6 | 6 | 7 | 7 |
| ZA-CdN <sub>4</sub>                | 1.07 | 5 | 17.6 | 1466.58 | 0.31 | 6 | 6 | 7 | 7 |
| ZA-LaN <sub>4</sub>                | 2.55 | 6 | 8.6  | 591.91  | 0.31 | 6 | 6 | 7 | 7 |

|                     |      |   |      |         |      |   |   |   |   |
|---------------------|------|---|------|---------|------|---|---|---|---|
| ZA-HfN <sub>4</sub> | 4.02 | 6 | 9.6  | 856.05  | 0.31 | 6 | 6 | 7 | 7 |
| ZA-TaN <sub>4</sub> | 1.69 | 6 | 10.6 | 1092.60 | 0.31 | 6 | 6 | 7 | 7 |
| ZA-WN <sub>4</sub>  | 1.28 | 6 | 11.6 | 1289.96 | 0.31 | 6 | 6 | 7 | 7 |
| ZA-ReN <sub>4</sub> | 0.58 | 6 | 12.6 | 1436.02 | 0.31 | 6 | 6 | 7 | 7 |
| ZA-OsN <sub>4</sub> | 0.88 | 6 | 13.6 | 1791.24 | 0.31 | 6 | 6 | 7 | 7 |
| ZA-IrN <sub>4</sub> | 0.28 | 6 | 14.6 | 1903.44 | 0.31 | 6 | 6 | 7 | 7 |
| ZA-PtN <sub>4</sub> | 1.21 | 6 | 15.6 | 1901.68 | 0.31 | 6 | 6 | 7 | 7 |
| ZA-AuN <sub>4</sub> | 0.93 | 6 | 16.6 | 2136.24 | 0.31 | 6 | 6 | 7 | 7 |

**Table. S2** Target-dataset (consist of ZZ-MC<sub>4</sub>, ZZ-MN<sub>1</sub>C<sub>3</sub>, ZZ-MN<sub>2</sub>C<sub>2</sub>, ZZ-MN<sub>2</sub>C<sub>2</sub>b, ZZ-MN<sub>3</sub>C<sub>1</sub>, ZZ-MN<sub>4</sub>). The first columns are the name of the catalysts and others columns are the descriptors.

| <b>Catalysts</b>    | <b><i>P</i></b> | <b><i>VEc</i></b> | <b><i>I</i><sub>1</sub><sup>*</sup><b><i>χ</i></b></b> | <b><i>DC</i></b> | <b><i>R</i><sub>1</sub></b> | <b><i>R</i><sub>2</sub></b> | <b><i>R</i><sub>3</sub></b> | <b><i>R</i><sub>4</sub></b> |
|---------------------|-----------------|-------------------|--------------------------------------------------------|------------------|-----------------------------|-----------------------------|-----------------------------|-----------------------------|
| ZZ-ScC <sub>4</sub> | 4               | 7.8               | 861.02                                                 | 0.80             | 5                           | 5                           | 5                           | 5                           |
| ZZ-TiC <sub>4</sub> | 4               | 8.8               | 1014.55                                                | 0.80             | 5                           | 5                           | 5                           | 5                           |
| ZZ-VC <sub>4</sub>  | 4               | 9.8               | 1060.97                                                | 0.80             | 5                           | 5                           | 5                           | 5                           |
| ZZ-CrC <sub>4</sub> | 4               | 10.8              | 1083.81                                                | 0.80             | 5                           | 5                           | 5                           | 5                           |
| ZZ-MnC <sub>4</sub> | 4               | 11.8              | 1111.82                                                | 0.80             | 5                           | 5                           | 5                           | 5                           |
| ZZ-FeC <sub>4</sub> | 4               | 12.8              | 1395.38                                                | 0.80             | 5                           | 5                           | 5                           | 5                           |
| ZZ-CoC <sub>4</sub> | 4               | 13.8              | 1429.55                                                | 0.80             | 5                           | 5                           | 5                           | 5                           |
| ZZ-NiC <sub>4</sub> | 4               | 14.8              | 1407.86                                                | 0.80             | 5                           | 5                           | 5                           | 5                           |
| ZZ-CuC <sub>4</sub> | 4               | 15.8              | 1416.45                                                | 0.80             | 5                           | 5                           | 5                           | 5                           |
| ZZ-ZnC <sub>4</sub> | 4               | 16.8              | 1495.56                                                | 0.80             | 5                           | 5                           | 5                           | 5                           |
| ZZ-YC <sub>4</sub>  | 5               | 7.8               | 731.88                                                 | 0.80             | 5                           | 5                           | 5                           | 5                           |
| ZZ-ZrC <sub>4</sub> | 5               | 8.8               | 851.33                                                 | 0.80             | 5                           | 5                           | 5                           | 5                           |
| ZZ-NbC <sub>4</sub> | 5               | 9.8               | 1043.36                                                | 0.80             | 5                           | 5                           | 5                           | 5                           |
| ZZ-MoC <sub>4</sub> | 5               | 10.8              | 1478.09                                                | 0.80             | 5                           | 5                           | 5                           | 5                           |

---

|                                    |   |      |         |      |   |   |   |   |
|------------------------------------|---|------|---------|------|---|---|---|---|
| ZZ-TcC <sub>4</sub>                | 5 | 11.8 | 1475.04 | 0.80 | 5 | 5 | 5 | 5 |
| ZZ-RuC <sub>4</sub>                | 5 | 12.8 | 1562.44 | 0.80 | 5 | 5 | 5 | 5 |
| ZZ-RhC <sub>4</sub>                | 5 | 13.8 | 1640.92 | 0.80 | 5 | 5 | 5 | 5 |
| ZZ-PdC <sub>4</sub>                | 5 | 14.8 | 1769.68 | 0.80 | 5 | 5 | 5 | 5 |
| ZZ-AgC <sub>4</sub>                | 5 | 15.8 | 1410.83 | 0.80 | 5 | 5 | 5 | 5 |
| ZZ-CdC <sub>4</sub>                | 5 | 16.8 | 1466.58 | 0.80 | 5 | 5 | 5 | 5 |
| ZZ-LaC <sub>4</sub>                | 6 | 7.8  | 591.91  | 0.80 | 5 | 5 | 5 | 5 |
| ZZ-HfC <sub>4</sub>                | 6 | 8.8  | 856.05  | 0.80 | 5 | 5 | 5 | 5 |
| ZZ-TaC <sub>4</sub>                | 6 | 9.8  | 1092.60 | 0.80 | 5 | 5 | 5 | 5 |
| ZZ-WC <sub>4</sub>                 | 6 | 10.8 | 1289.96 | 0.80 | 5 | 5 | 5 | 5 |
| ZZ-ReC <sub>4</sub>                | 6 | 11.8 | 1436.02 | 0.80 | 5 | 5 | 5 | 5 |
| ZZ-OsC <sub>4</sub>                | 6 | 12.8 | 1791.24 | 0.80 | 5 | 5 | 5 | 5 |
| ZZ-IrC <sub>4</sub>                | 6 | 13.8 | 1903.44 | 0.80 | 5 | 5 | 5 | 5 |
| ZZ-PtC <sub>4</sub>                | 6 | 14.8 | 1901.68 | 0.80 | 5 | 5 | 5 | 5 |
| ZZ-AuC <sub>4</sub>                | 6 | 15.8 | 2136.24 | 0.80 | 5 | 5 | 5 | 5 |
| ZZ-ScN <sub>1</sub> C <sub>3</sub> | 4 | 8    | 861.02  | 0.55 | 5 | 5 | 6 | 6 |
| ZZ-TiN <sub>1</sub> C <sub>3</sub> | 4 | 9    | 1014.55 | 0.55 | 5 | 5 | 6 | 6 |
| ZZ-VN <sub>1</sub> C <sub>3</sub>  | 4 | 10   | 1060.97 | 0.55 | 5 | 5 | 6 | 6 |
| ZZ-CrN <sub>1</sub> C <sub>3</sub> | 4 | 11   | 1083.81 | 0.55 | 5 | 5 | 6 | 6 |
| ZZ-MnN <sub>1</sub> C <sub>3</sub> | 4 | 12   | 1111.82 | 0.55 | 5 | 5 | 6 | 6 |
| ZZ-FeN <sub>1</sub> C <sub>3</sub> | 4 | 13   | 1395.38 | 0.55 | 5 | 5 | 6 | 6 |
| ZZ-CoN <sub>1</sub> C <sub>3</sub> | 4 | 14   | 1429.55 | 0.55 | 5 | 5 | 6 | 6 |
| ZZ-NiN <sub>1</sub> C <sub>3</sub> | 4 | 15   | 1407.86 | 0.55 | 5 | 5 | 6 | 6 |
| ZZ-CuN <sub>1</sub> C <sub>3</sub> | 4 | 16   | 1416.45 | 0.55 | 5 | 5 | 6 | 6 |
| ZZ-ZnN <sub>1</sub> C <sub>3</sub> | 4 | 17   | 1495.56 | 0.55 | 5 | 5 | 6 | 6 |
| ZZ-YN <sub>1</sub> C <sub>3</sub>  | 5 | 8    | 731.88  | 0.55 | 5 | 5 | 6 | 6 |
| ZZ-ZrN <sub>1</sub> C <sub>3</sub> | 5 | 9    | 851.33  | 0.55 | 5 | 5 | 6 | 6 |
| ZZ-NbN <sub>1</sub> C <sub>3</sub> | 5 | 10   | 1043.36 | 0.55 | 5 | 5 | 6 | 6 |

---

|                                    |   |      |         |      |   |   |   |   |
|------------------------------------|---|------|---------|------|---|---|---|---|
| ZZ-MoN <sub>1</sub> C <sub>3</sub> | 5 | 11   | 1478.09 | 0.55 | 5 | 5 | 6 | 6 |
| ZZ-TcN <sub>1</sub> C <sub>3</sub> | 5 | 12   | 1475.04 | 0.55 | 5 | 5 | 6 | 6 |
| ZZ-RuN <sub>1</sub> C <sub>3</sub> | 5 | 13   | 1562.44 | 0.55 | 5 | 5 | 6 | 6 |
| ZZ-RhN <sub>1</sub> C <sub>3</sub> | 5 | 14   | 1640.92 | 0.55 | 5 | 5 | 6 | 6 |
| ZZ-PdN <sub>1</sub> C <sub>3</sub> | 5 | 15   | 1769.68 | 0.55 | 5 | 5 | 6 | 6 |
| ZZ-AgN <sub>1</sub> C <sub>3</sub> | 5 | 16   | 1410.83 | 0.55 | 5 | 5 | 6 | 6 |
| ZZ-CdN <sub>1</sub> C <sub>3</sub> | 5 | 17   | 1466.58 | 0.55 | 5 | 5 | 6 | 6 |
| ZZ-LaN <sub>1</sub> C <sub>3</sub> | 6 | 8    | 591.91  | 0.55 | 5 | 5 | 6 | 6 |
| ZZ-HfN <sub>1</sub> C <sub>3</sub> | 6 | 9    | 856.05  | 0.55 | 5 | 5 | 6 | 6 |
| ZZ-TaN <sub>1</sub> C <sub>3</sub> | 6 | 10   | 1092.60 | 0.55 | 5 | 5 | 6 | 6 |
| ZZ-WN <sub>1</sub> C <sub>3</sub>  | 6 | 11   | 1289.96 | 0.55 | 5 | 5 | 6 | 6 |
| ZZ-ReN <sub>1</sub> C <sub>3</sub> | 6 | 12   | 1436.02 | 0.55 | 5 | 5 | 6 | 6 |
| ZZ-OsN <sub>1</sub> C <sub>3</sub> | 6 | 13   | 1791.24 | 0.55 | 5 | 5 | 6 | 6 |
| ZZ-IrN <sub>1</sub> C <sub>3</sub> | 6 | 14   | 1903.44 | 0.55 | 5 | 5 | 6 | 6 |
| ZZ-PtN <sub>1</sub> C <sub>3</sub> | 6 | 15   | 1901.68 | 0.55 | 5 | 5 | 6 | 6 |
| ZZ-AuN <sub>1</sub> C <sub>3</sub> | 6 | 16   | 2136.24 | 0.55 | 5 | 5 | 6 | 6 |
| ZZ-ScN <sub>2</sub> C <sub>2</sub> | 4 | 8.2  | 861.02  | 0.34 | 6 | 6 | 6 | 6 |
| ZZ-TiN <sub>2</sub> C <sub>2</sub> | 4 | 9.2  | 1014.55 | 0.34 | 6 | 6 | 6 | 6 |
| ZZ-VN <sub>2</sub> C <sub>2</sub>  | 4 | 10.2 | 1060.97 | 0.34 | 6 | 6 | 6 | 6 |
| ZZ-CrN <sub>2</sub> C <sub>2</sub> | 4 | 11.2 | 1083.81 | 0.34 | 6 | 6 | 6 | 6 |
| ZZ-MnN <sub>2</sub> C <sub>2</sub> | 4 | 12.2 | 1111.82 | 0.34 | 6 | 6 | 6 | 6 |
| ZZ-FeN <sub>2</sub> C <sub>2</sub> | 4 | 13.2 | 1395.38 | 0.34 | 6 | 6 | 6 | 6 |
| ZZ-CoN <sub>2</sub> C <sub>2</sub> | 4 | 14.2 | 1429.55 | 0.34 | 6 | 6 | 6 | 6 |
| ZZ-NiN <sub>2</sub> C <sub>2</sub> | 4 | 15.2 | 1407.86 | 0.34 | 6 | 6 | 6 | 6 |
| ZZ-CuN <sub>2</sub> C <sub>2</sub> | 4 | 16.2 | 1416.45 | 0.34 | 6 | 6 | 6 | 6 |
| ZZ-ZnN <sub>2</sub> C <sub>2</sub> | 4 | 17.2 | 1495.56 | 0.34 | 6 | 6 | 6 | 6 |
| ZZ-YN <sub>2</sub> C <sub>2</sub>  | 5 | 8.2  | 731.88  | 0.34 | 6 | 6 | 6 | 6 |
| ZZ-ZrN <sub>2</sub> C <sub>2</sub> | 5 | 9.2  | 851.33  | 0.34 | 6 | 6 | 6 | 6 |

---

|                                      |   |      |         |      |   |   |   |   |
|--------------------------------------|---|------|---------|------|---|---|---|---|
| ZZ-NbN <sub>2</sub> C <sub>2</sub>   | 5 | 10.2 | 1043.36 | 0.34 | 6 | 6 | 6 | 6 |
| ZZ-MoN <sub>2</sub> C <sub>2</sub>   | 5 | 11.2 | 1478.09 | 0.34 | 6 | 6 | 6 | 6 |
| ZZ-TcN <sub>2</sub> C <sub>2</sub>   | 5 | 12.2 | 1475.04 | 0.34 | 6 | 6 | 6 | 6 |
| ZZ-RuN <sub>2</sub> C <sub>2</sub>   | 5 | 13.2 | 1562.44 | 0.34 | 6 | 6 | 6 | 6 |
| ZZ-RhN <sub>2</sub> C <sub>2</sub>   | 5 | 14.2 | 1640.92 | 0.34 | 6 | 6 | 6 | 6 |
| ZZ-PdN <sub>2</sub> C <sub>2</sub>   | 5 | 15.2 | 1769.68 | 0.34 | 6 | 6 | 6 | 6 |
| ZZ-AgN <sub>2</sub> C <sub>2</sub>   | 5 | 16.2 | 1410.83 | 0.34 | 6 | 6 | 6 | 6 |
| ZZ-CdN <sub>2</sub> C <sub>2</sub>   | 5 | 17.2 | 1466.58 | 0.34 | 6 | 6 | 6 | 6 |
| ZZ-LaN <sub>2</sub> C <sub>2</sub>   | 6 | 8.2  | 591.91  | 0.34 | 6 | 6 | 6 | 6 |
| ZZ-HfN <sub>2</sub> C <sub>2</sub>   | 6 | 9.2  | 856.05  | 0.34 | 6 | 6 | 6 | 6 |
| ZZ-TaN <sub>2</sub> C <sub>2</sub>   | 6 | 10.2 | 1092.60 | 0.34 | 6 | 6 | 6 | 6 |
| ZZ-WN <sub>2</sub> C <sub>2</sub>    | 6 | 11.2 | 1289.96 | 0.34 | 6 | 6 | 6 | 6 |
| ZZ-ReN <sub>2</sub> C <sub>2</sub>   | 6 | 12.2 | 1436.02 | 0.34 | 6 | 6 | 6 | 6 |
| ZZ-OsN <sub>2</sub> C <sub>2</sub>   | 6 | 13.2 | 1791.24 | 0.34 | 6 | 6 | 6 | 6 |
| ZZ-IrN <sub>2</sub> C <sub>2</sub>   | 6 | 14.2 | 1903.44 | 0.34 | 6 | 6 | 6 | 6 |
| ZZ-PtN <sub>2</sub> C <sub>2</sub>   | 6 | 15.2 | 1901.68 | 0.34 | 6 | 6 | 6 | 6 |
| ZZ-AuN <sub>2</sub> C <sub>2</sub>   | 6 | 16.2 | 2136.24 | 0.34 | 6 | 6 | 6 | 6 |
| ZZ-ScN <sub>2</sub> C <sub>2</sub> b | 4 | 8.2  | 861.02  | 0.67 | 5 | 6 | 6 | 7 |
| ZZ-TiN <sub>2</sub> C <sub>2</sub> b | 4 | 9.2  | 1014.55 | 0.67 | 5 | 6 | 6 | 7 |
| ZZ-VN <sub>2</sub> C <sub>2</sub> b  | 4 | 10.2 | 1060.97 | 0.67 | 5 | 6 | 6 | 7 |
| ZZ-CrN <sub>2</sub> C <sub>2</sub> b | 4 | 11.2 | 1083.81 | 0.67 | 5 | 6 | 6 | 7 |
| ZZ-MnN <sub>2</sub> C <sub>2</sub> b | 4 | 12.2 | 1111.82 | 0.67 | 5 | 6 | 6 | 7 |
| ZZ-FeN <sub>2</sub> C <sub>2</sub> b | 4 | 13.2 | 1395.38 | 0.67 | 5 | 6 | 6 | 7 |
| ZZ-CoN <sub>2</sub> C <sub>2</sub> b | 4 | 14.2 | 1429.55 | 0.67 | 5 | 6 | 6 | 7 |
| ZZ-NiN <sub>2</sub> C <sub>2</sub> b | 4 | 15.2 | 1407.86 | 0.67 | 5 | 6 | 6 | 7 |
| ZZ-CuN <sub>2</sub> C <sub>2</sub> b | 4 | 16.2 | 1416.45 | 0.67 | 5 | 6 | 6 | 7 |
| ZZ-ZnN <sub>2</sub> C <sub>2</sub> b | 4 | 17.2 | 1495.56 | 0.67 | 5 | 6 | 6 | 7 |
| ZZ-YN <sub>2</sub> C <sub>2</sub> b  | 5 | 8.2  | 731.88  | 0.67 | 5 | 6 | 6 | 7 |

---

|                                      |   |      |         |      |   |   |   |   |
|--------------------------------------|---|------|---------|------|---|---|---|---|
| ZZ-ZrN <sub>2</sub> C <sub>2</sub> b | 5 | 9.2  | 851.33  | 0.67 | 5 | 6 | 6 | 7 |
| ZZ-NbN <sub>2</sub> C <sub>2</sub> b | 5 | 10.2 | 1043.36 | 0.67 | 5 | 6 | 6 | 7 |
| ZZ-MoN <sub>2</sub> C <sub>2</sub> b | 5 | 11.2 | 1478.09 | 0.67 | 5 | 6 | 6 | 7 |
| ZZ-TcN <sub>2</sub> C <sub>2</sub> b | 5 | 12.2 | 1475.04 | 0.67 | 5 | 6 | 6 | 7 |
| ZZ-RuN <sub>2</sub> C <sub>2</sub> b | 5 | 13.2 | 1562.44 | 0.67 | 5 | 6 | 6 | 7 |
| ZZ-RhN <sub>2</sub> C <sub>2</sub> b | 5 | 14.2 | 1640.92 | 0.67 | 5 | 6 | 6 | 7 |
| ZZ-PdN <sub>2</sub> C <sub>2</sub> b | 5 | 15.2 | 1769.68 | 0.67 | 5 | 6 | 6 | 7 |
| ZZ-AgN <sub>2</sub> C <sub>2</sub> b | 5 | 16.2 | 1410.83 | 0.67 | 5 | 6 | 6 | 7 |
| ZZ-CdN <sub>2</sub> C <sub>2</sub> b | 5 | 17.2 | 1466.58 | 0.67 | 5 | 6 | 6 | 7 |
| ZZ-LaN <sub>2</sub> C <sub>2</sub> b | 6 | 8.2  | 591.91  | 0.67 | 5 | 6 | 6 | 7 |
| ZZ-HfN <sub>2</sub> C <sub>2</sub> b | 6 | 9.2  | 856.05  | 0.67 | 5 | 6 | 6 | 7 |
| ZZ-TaN <sub>2</sub> C <sub>2</sub> b | 6 | 10.2 | 1092.60 | 0.67 | 5 | 6 | 6 | 7 |
| ZZ-WN <sub>2</sub> C <sub>2</sub> b  | 6 | 11.2 | 1289.96 | 0.67 | 5 | 6 | 6 | 7 |
| ZZ-ReN <sub>2</sub> C <sub>2</sub> b | 6 | 12.2 | 1436.02 | 0.67 | 5 | 6 | 6 | 7 |
| ZZ-OsN <sub>2</sub> C <sub>2</sub> b | 6 | 13.2 | 1791.24 | 0.67 | 5 | 6 | 6 | 7 |
| ZZ-IrN <sub>2</sub> C <sub>2</sub> b | 6 | 14.2 | 1903.44 | 0.67 | 5 | 6 | 6 | 7 |
| ZZ-PtN <sub>2</sub> C <sub>2</sub> b | 6 | 15.2 | 1901.68 | 0.67 | 5 | 6 | 6 | 7 |
| ZZ-AuN <sub>2</sub> C <sub>2</sub> b | 6 | 16.2 | 2136.24 | 0.67 | 5 | 6 | 6 | 7 |
| ZZ-ScN <sub>3</sub> C <sub>1</sub>   | 4 | 8.4  | 861.02  | 0.77 | 6 | 6 | 7 | 7 |
| ZZ-TiN <sub>3</sub> C <sub>1</sub>   | 4 | 9.4  | 1014.55 | 0.77 | 6 | 6 | 7 | 7 |
| ZZ-VN <sub>3</sub> C <sub>1</sub>    | 4 | 10.4 | 1060.97 | 0.77 | 6 | 6 | 7 | 7 |
| ZZ-CrN <sub>3</sub> C <sub>1</sub>   | 4 | 11.4 | 1083.81 | 0.77 | 6 | 6 | 7 | 7 |
| ZZ-MnN <sub>3</sub> C <sub>1</sub>   | 4 | 12.4 | 1111.82 | 0.77 | 6 | 6 | 7 | 7 |
| ZZ-FeN <sub>3</sub> C <sub>1</sub>   | 4 | 13.4 | 1395.38 | 0.77 | 6 | 6 | 7 | 7 |
| ZZ-CoN <sub>3</sub> C <sub>1</sub>   | 4 | 14.4 | 1429.55 | 0.77 | 6 | 6 | 7 | 7 |
| ZZ-NiN <sub>3</sub> C <sub>1</sub>   | 4 | 15.4 | 1407.86 | 0.77 | 6 | 6 | 7 | 7 |
| ZZ-CuN <sub>3</sub> C <sub>1</sub>   | 4 | 16.4 | 1416.45 | 0.77 | 6 | 6 | 7 | 7 |
| ZZ-ZnN <sub>3</sub> C <sub>1</sub>   | 4 | 17.4 | 1495.56 | 0.77 | 6 | 6 | 7 | 7 |

---

|                                    |   |      |         |      |   |   |   |   |
|------------------------------------|---|------|---------|------|---|---|---|---|
| ZZ-YN <sub>3</sub> C <sub>1</sub>  | 5 | 8.4  | 731.88  | 0.77 | 6 | 6 | 7 | 7 |
| ZZ-ZrN <sub>3</sub> C <sub>1</sub> | 5 | 9.4  | 851.33  | 0.77 | 6 | 6 | 7 | 7 |
| ZZ-NbN <sub>3</sub> C <sub>1</sub> | 5 | 10.4 | 1043.36 | 0.77 | 6 | 6 | 7 | 7 |
| ZZ-MoN <sub>3</sub> C <sub>1</sub> | 5 | 11.4 | 1478.09 | 0.77 | 6 | 6 | 7 | 7 |
| ZZ-TcN <sub>3</sub> C <sub>1</sub> | 5 | 12.4 | 1475.04 | 0.77 | 6 | 6 | 7 | 7 |
| ZZ-RuN <sub>3</sub> C <sub>1</sub> | 5 | 13.4 | 1562.44 | 0.77 | 6 | 6 | 7 | 7 |
| ZZ-RhN <sub>3</sub> C <sub>1</sub> | 5 | 14.4 | 1640.92 | 0.77 | 6 | 6 | 7 | 7 |
| ZZ-PdN <sub>3</sub> C <sub>1</sub> | 5 | 15.4 | 1769.68 | 0.77 | 6 | 6 | 7 | 7 |
| ZZ-AgN <sub>3</sub> C <sub>1</sub> | 5 | 16.4 | 1410.83 | 0.77 | 6 | 6 | 7 | 7 |
| ZZ-CdN <sub>3</sub> C <sub>1</sub> | 5 | 17.4 | 1466.58 | 0.77 | 6 | 6 | 7 | 7 |
| ZZ-LaN <sub>3</sub> C <sub>1</sub> | 6 | 8.4  | 591.91  | 0.77 | 6 | 6 | 7 | 7 |
| ZZ-HfN <sub>3</sub> C <sub>1</sub> | 6 | 9.4  | 856.05  | 0.77 | 6 | 6 | 7 | 7 |
| ZZ-TaN <sub>3</sub> C <sub>1</sub> | 6 | 10.4 | 1092.60 | 0.77 | 6 | 6 | 7 | 7 |
| ZZ-WN <sub>3</sub> C <sub>1</sub>  | 6 | 11.4 | 1289.96 | 0.77 | 6 | 6 | 7 | 7 |
| ZZ-ReN <sub>3</sub> C <sub>1</sub> | 6 | 12.4 | 1436.02 | 0.77 | 6 | 6 | 7 | 7 |
| ZZ-OsN <sub>3</sub> C <sub>1</sub> | 6 | 13.4 | 1791.24 | 0.77 | 6 | 6 | 7 | 7 |
| ZZ-IrN <sub>3</sub> C <sub>1</sub> | 6 | 14.4 | 1903.44 | 0.77 | 6 | 6 | 7 | 7 |
| ZZ-PtN <sub>3</sub> C <sub>1</sub> | 6 | 15.4 | 1901.68 | 0.77 | 6 | 6 | 7 | 7 |
| ZZ-AuN <sub>3</sub> C <sub>1</sub> | 6 | 16.4 | 2136.24 | 0.77 | 6 | 6 | 7 | 7 |
| ZZ-ScN <sub>4</sub>                | 4 | 8.6  | 861.02  | 1.14 | 7 | 7 | 7 | 7 |
| ZZ-TiN <sub>4</sub>                | 4 | 9.6  | 1014.55 | 1.14 | 7 | 7 | 7 | 7 |
| ZZ-VN <sub>4</sub>                 | 4 | 10.6 | 1060.97 | 1.14 | 7 | 7 | 7 | 7 |
| ZZ-CrN <sub>4</sub>                | 4 | 11.6 | 1083.81 | 1.14 | 7 | 7 | 7 | 7 |
| ZZ-MnN <sub>4</sub>                | 4 | 12.6 | 1111.82 | 1.14 | 7 | 7 | 7 | 7 |
| ZZ-FeN <sub>4</sub>                | 4 | 13.6 | 1395.38 | 1.14 | 7 | 7 | 7 | 7 |
| ZZ-CoN <sub>4</sub>                | 4 | 14.6 | 1429.55 | 1.14 | 7 | 7 | 7 | 7 |
| ZZ-NiN <sub>4</sub>                | 4 | 15.6 | 1407.86 | 1.14 | 7 | 7 | 7 | 7 |
| ZZ-CuN <sub>4</sub>                | 4 | 16.6 | 1416.45 | 1.14 | 7 | 7 | 7 | 7 |

|                     |   |      |         |      |   |   |   |   |
|---------------------|---|------|---------|------|---|---|---|---|
| ZZ-ZnN <sub>4</sub> | 4 | 17.6 | 1495.56 | 1.14 | 7 | 7 | 7 | 7 |
| ZZ-YN <sub>4</sub>  | 5 | 8.6  | 731.88  | 1.14 | 7 | 7 | 7 | 7 |
| ZZ-ZrN <sub>4</sub> | 5 | 9.6  | 851.33  | 1.14 | 7 | 7 | 7 | 7 |
| ZZ-NbN <sub>4</sub> | 5 | 10.6 | 1043.36 | 1.14 | 7 | 7 | 7 | 7 |
| ZZ-MoN <sub>4</sub> | 5 | 11.6 | 1478.09 | 1.14 | 7 | 7 | 7 | 7 |
| ZZ-TcN <sub>4</sub> | 5 | 12.6 | 1475.04 | 1.14 | 7 | 7 | 7 | 7 |
| ZZ-RuN <sub>4</sub> | 5 | 13.6 | 1562.44 | 1.14 | 7 | 7 | 7 | 7 |
| ZZ-RhN <sub>4</sub> | 5 | 14.6 | 1640.92 | 1.14 | 7 | 7 | 7 | 7 |
| ZZ-PdN <sub>4</sub> | 5 | 15.6 | 1769.68 | 1.14 | 7 | 7 | 7 | 7 |
| ZZ-AgN <sub>4</sub> | 5 | 16.6 | 1410.83 | 1.14 | 7 | 7 | 7 | 7 |
| ZZ-CdN <sub>4</sub> | 5 | 17.6 | 1466.58 | 1.14 | 7 | 7 | 7 | 7 |
| ZZ-LaN <sub>4</sub> | 6 | 8.6  | 591.91  | 1.14 | 7 | 7 | 7 | 7 |
| ZZ-HfN <sub>4</sub> | 6 | 9.6  | 856.05  | 1.14 | 7 | 7 | 7 | 7 |
| ZZ-TaN <sub>4</sub> | 6 | 10.6 | 1092.60 | 1.14 | 7 | 7 | 7 | 7 |
| ZZ-WN <sub>4</sub>  | 6 | 11.6 | 1289.96 | 1.14 | 7 | 7 | 7 | 7 |
| ZZ-ReN <sub>4</sub> | 6 | 12.6 | 1436.02 | 1.14 | 7 | 7 | 7 | 7 |
| ZZ-OsN <sub>4</sub> | 6 | 13.6 | 1791.24 | 1.14 | 7 | 7 | 7 | 7 |
| ZZ-IrN <sub>4</sub> | 6 | 14.6 | 1903.44 | 1.14 | 7 | 7 | 7 | 7 |
| ZZ-PtN <sub>4</sub> | 6 | 15.6 | 1901.68 | 1.14 | 7 | 7 | 7 | 7 |
| ZZ-AuN <sub>4</sub> | 6 | 16.6 | 2136.24 | 1.14 | 7 | 7 | 7 | 7 |

**Table. S3** the values of high-performance catalyst retention rate  $r_R$  and high-performance catalyst occupancy rate  $r_O$  for each of group in Table. 1.

| <b>group</b> | <b>descriptors</b>                  | $r_O$ | $r_R$ |
|--------------|-------------------------------------|-------|-------|
| G1           | $CM, I_1, N_M, VE, E_d, P$          | 0.222 | 0.360 |
| G2           | $CM, I_1, N_M, VE, E_d, P, VEc, DC$ | 0.385 | 0.529 |
| G3           | $P, VEc, DC$                        | 0.413 | 0.648 |



|     |                                               |              |              |
|-----|-----------------------------------------------|--------------|--------------|
| G4  | $P, VEc, I_1^*\chi$                           | 0.382        | 0.652        |
| G5  | $CM, P, VEc, DC, I_1^*\chi$                   | 0.401        | 0.577        |
| G6  | $P, VEc, DC, I_1^*\chi$                       | <b>0.421</b> | <b>0.671</b> |
| G7  | $P, VEc, DC, I_1^*\chi, n_N$                  | 0.411        | 0.656        |
| G8  | $P, VEc, DC, I_1^*\chi, n_N, \eta_{ORR}^*n_N$ | 0.409        | 0.848        |
| G9  | $P, VEc, DC, I_1^*\chi, \varphi$              | 0.396        | 0.633        |
| G10 | $P, DC, I_1^*\chi, \varphi$                   | 0.233        | 0.431        |

\* The maximum of  $r_O$  and  $r_R$  are marked with bold font (G8 with the descriptor  $\eta_{ORR}^*n_N$  and is ignored in evaluating).

**Table. S4** ORR overpotential  $\eta_{model}$  of catalysts of ZZ-MN<sub>x</sub>C<sub>y</sub> system predicted by the ML model, which using descriptors  $VEc, DC, I_1^*\chi$  and  $P$  as catalysts feature.

| Catalysts           | $\eta_{model}$ | Catalysts                          | $\eta_{model}$ | Catalysts                          | $\eta_{model}$ |
|---------------------|----------------|------------------------------------|----------------|------------------------------------|----------------|
| ZZ-ScC <sub>4</sub> | 2.007          | ZZ-ScN <sub>2</sub> C <sub>2</sub> | 2.120          | ZZ-ScN <sub>3</sub> C <sub>1</sub> | 2.394          |
| ZZ-TiC <sub>4</sub> | 2.867          | ZZ-TiN <sub>2</sub> C <sub>2</sub> | 2.984          | ZZ-TiN <sub>3</sub> C <sub>1</sub> | 3.244          |
| ZZ-VC <sub>4</sub>  | 3.004          | ZZ-VN <sub>2</sub> C <sub>2</sub>  | 2.620          | ZZ-VN <sub>3</sub> C <sub>1</sub>  | 2.266          |
| ZZ-CrC <sub>4</sub> | 1.809          | ZZ-CrN <sub>2</sub> C <sub>2</sub> | 1.857          | ZZ-CrN <sub>3</sub> C <sub>1</sub> | 1.502          |
| ZZ-MnC <sub>4</sub> | 1.627          | ZZ-MnN <sub>2</sub> C <sub>2</sub> | 1.194          | ZZ-MnN <sub>3</sub> C <sub>1</sub> | 1.218          |
| ZZ-FeC <sub>4</sub> | 0.964          | ZZ-FeN <sub>2</sub> C <sub>2</sub> | 0.915          | ZZ-FeN <sub>3</sub> C <sub>1</sub> | 0.946          |
| ZZ-CoC <sub>4</sub> | 0.755          | ZZ-CoN <sub>2</sub> C <sub>2</sub> | 0.717          | ZZ-CoN <sub>3</sub> C <sub>1</sub> | 0.517          |
| ZZ-NiC <sub>4</sub> | 0.491          | ZZ-NiN <sub>2</sub> C <sub>2</sub> | 0.772          | ZZ-NiN <sub>3</sub> C <sub>1</sub> | 0.812          |
| ZZ-CuC <sub>4</sub> | 1.052          | ZZ-CuN <sub>2</sub> C <sub>2</sub> | 0.945          | ZZ-CuN <sub>3</sub> C <sub>1</sub> | 0.963          |
| ZZ-ZnC <sub>4</sub> | 0.646          | ZZ-ZnN <sub>2</sub> C <sub>2</sub> | 0.760          | ZZ-ZnN <sub>3</sub> C <sub>1</sub> | 0.588          |
| ZZ-YC <sub>4</sub>  | 1.966          | ZZ-YN <sub>2</sub> C <sub>2</sub>  | 2.011          | ZZ-YN <sub>3</sub> C <sub>1</sub>  | 2.312          |
| ZZ-ZrC <sub>4</sub> | 2.835          | ZZ-ZrN <sub>2</sub> C <sub>2</sub> | 3.021          | ZZ-ZrN <sub>3</sub> C <sub>1</sub> | 3.432          |
| ZZ-NbC <sub>4</sub> | 3.212          | ZZ-NbN <sub>2</sub> C <sub>2</sub> | 3.100          | ZZ-NbN <sub>3</sub> C <sub>1</sub> | 2.450          |
| ZZ-MoC <sub>4</sub> | 1.891          | ZZ-MoN <sub>2</sub> C <sub>2</sub> | 1.774          | ZZ-MoN <sub>3</sub> C <sub>1</sub> | 1.614          |

|                                    |       |                                      |       |                                    |       |
|------------------------------------|-------|--------------------------------------|-------|------------------------------------|-------|
| ZZ-TcC <sub>4</sub>                | 1.609 | ZZ-TcN <sub>2</sub> C <sub>2</sub>   | 1.020 | ZZ-TcN <sub>3</sub> C <sub>1</sub> | 1.110 |
| ZZ-RuC <sub>4</sub>                | 0.983 | ZZ-RuN <sub>2</sub> C <sub>2</sub>   | 0.890 | ZZ-RuN <sub>3</sub> C <sub>1</sub> | 0.645 |
| ZZ-RhC <sub>4</sub>                | 0.809 | ZZ-RhN <sub>2</sub> C <sub>2</sub>   | 0.909 | ZZ-RhN <sub>3</sub> C <sub>1</sub> | 0.577 |
| ZZ-PdC <sub>4</sub>                | 0.470 | ZZ-PdN <sub>2</sub> C <sub>2</sub>   | 0.851 | ZZ-PdN <sub>3</sub> C <sub>1</sub> | 1.055 |
| ZZ-AgC <sub>4</sub>                | 1.096 | ZZ-AgN <sub>2</sub> C <sub>2</sub>   | 1.019 | ZZ-AgN <sub>3</sub> C <sub>1</sub> | 1.066 |
| ZZ-CdC <sub>4</sub>                | 0.837 | ZZ-CdN <sub>2</sub> C <sub>2</sub>   | 0.761 | ZZ-CdN <sub>3</sub> C <sub>1</sub> | 0.866 |
| ZZ-LaC <sub>4</sub>                | 1.692 | ZZ-LaN <sub>2</sub> C <sub>2</sub>   | 1.585 | ZZ-LaN <sub>3</sub> C <sub>1</sub> | 1.936 |
| ZZ-HfC <sub>4</sub>                | 2.914 | ZZ-HfN <sub>2</sub> C <sub>2</sub>   | 3.342 | ZZ-HfN <sub>3</sub> C <sub>1</sub> | 3.679 |
| ZZ-TaC <sub>4</sub>                | 3.219 | ZZ-TaN <sub>2</sub> C <sub>2</sub>   | 1.809 | ZZ-TaN <sub>3</sub> C <sub>1</sub> | 1.769 |
| ZZ-WC <sub>4</sub>                 | 1.661 | ZZ-WN <sub>2</sub> C <sub>2</sub>    | 1.806 | ZZ-WN <sub>3</sub> C <sub>1</sub>  | 1.537 |
| ZZ-ReC <sub>4</sub>                | 1.702 | ZZ-ReN <sub>2</sub> C <sub>2</sub>   | 0.636 | ZZ-ReN <sub>3</sub> C <sub>1</sub> | 1.049 |
| ZZ-OsC <sub>4</sub>                | 1.024 | ZZ-OsN <sub>2</sub> C <sub>2</sub>   | 0.910 | ZZ-OsN <sub>3</sub> C <sub>1</sub> | 0.988 |
| ZZ-IrC <sub>4</sub>                | 1.004 | ZZ-IrN <sub>2</sub> C <sub>2</sub>   | 1.081 | ZZ-IrN <sub>3</sub> C <sub>1</sub> | 0.685 |
| ZZ-PtC <sub>4</sub>                | 0.498 | ZZ-PtN <sub>2</sub> C <sub>2</sub>   | 0.857 | ZZ-PtN <sub>3</sub> C <sub>1</sub> | 1.096 |
| ZZ-AuC <sub>4</sub>                | 1.154 | ZZ-AuN <sub>2</sub> C <sub>2</sub>   | 1.162 | ZZ-AuN <sub>3</sub> C <sub>1</sub> | 1.134 |
| ZZ-ScN <sub>1</sub> C <sub>3</sub> | 1.977 | ZZ-ScN <sub>2</sub> C <sub>2</sub> b | 2.120 | ZZ-ScN <sub>4</sub>                | 2.839 |
| ZZ-TiN <sub>1</sub> C <sub>3</sub> | 2.896 | ZZ-TiN <sub>2</sub> C <sub>2</sub> b | 2.984 | ZZ-TiN <sub>4</sub>                | 2.997 |
| ZZ-VN <sub>1</sub> C <sub>3</sub>  | 2.962 | ZZ-VN <sub>2</sub> C <sub>2</sub> b  | 2.620 | ZZ-VN <sub>4</sub>                 | 1.371 |
| ZZ-CrN <sub>1</sub> C <sub>3</sub> | 2.063 | ZZ-CrN <sub>2</sub> C <sub>2</sub> b | 1.857 | ZZ-CrN <sub>4</sub>                | 1.412 |
| ZZ-MnN <sub>1</sub> C <sub>3</sub> | 1.763 | ZZ-MnN <sub>2</sub> C <sub>2</sub> b | 1.194 | ZZ-MnN <sub>4</sub>                | 0.972 |
| ZZ-FeN <sub>1</sub> C <sub>3</sub> | 1.059 | ZZ-FeN <sub>2</sub> C <sub>2</sub> b | 0.915 | ZZ-FeN <sub>4</sub>                | 0.734 |
| ZZ-CoN <sub>1</sub> C <sub>3</sub> | 0.776 | ZZ-CoN <sub>2</sub> C <sub>2</sub> b | 0.717 | ZZ-CoN <sub>4</sub>                | 0.445 |
| ZZ-NiN <sub>1</sub> C <sub>3</sub> | 0.537 | ZZ-NiN <sub>2</sub> C <sub>2</sub> b | 0.772 | ZZ-NiN <sub>4</sub>                | 0.957 |
| ZZ-CuN <sub>1</sub> C <sub>3</sub> | 1.015 | ZZ-CuN <sub>2</sub> C <sub>2</sub> b | 0.945 | ZZ-CuN <sub>4</sub>                | 0.940 |
| ZZ-ZnN <sub>1</sub> C <sub>3</sub> | 0.726 | ZZ-ZnN <sub>2</sub> C <sub>2</sub> b | 0.760 | ZZ-ZnN <sub>4</sub>                | 1.367 |
| ZZ-YN <sub>1</sub> C <sub>3</sub>  | 1.922 | ZZ-YN <sub>2</sub> C <sub>2</sub> b  | 2.011 | ZZ-YN <sub>4</sub>                 | 2.765 |
| ZZ-ZrN <sub>1</sub> C <sub>3</sub> | 2.905 | ZZ-ZrN <sub>2</sub> C <sub>2</sub> b | 3.021 | ZZ-ZrN <sub>4</sub>                | 3.340 |
| ZZ-NbN <sub>1</sub> C <sub>3</sub> | 3.155 | ZZ-NbN <sub>2</sub> C <sub>2</sub> b | 3.100 | ZZ-NbN <sub>4</sub>                | 1.473 |

|                                    |       |                                      |       |                     |       |
|------------------------------------|-------|--------------------------------------|-------|---------------------|-------|
| ZZ-MoN <sub>1</sub> C <sub>3</sub> | 2.090 | ZZ-MoN <sub>2</sub> C <sub>2</sub> b | 1.774 | ZZ-MoN <sub>4</sub> | 1.539 |
| ZZ-TcN <sub>1</sub> C <sub>3</sub> | 1.708 | ZZ-TcN <sub>2</sub> C <sub>2</sub> b | 1.020 | ZZ-TcN <sub>4</sub> | 0.995 |
| ZZ-RuN <sub>1</sub> C <sub>3</sub> | 1.311 | ZZ-RuN <sub>2</sub> C <sub>2</sub> b | 0.890 | ZZ-RuN <sub>4</sub> | 0.873 |
| ZZ-RhN <sub>1</sub> C <sub>3</sub> | 0.909 | ZZ-RhN <sub>2</sub> C <sub>2</sub> b | 0.909 | ZZ-RhN <sub>4</sub> | 0.436 |
| ZZ-PdN <sub>1</sub> C <sub>3</sub> | 0.512 | ZZ-PdN <sub>2</sub> C <sub>2</sub> b | 0.851 | ZZ-PdN <sub>4</sub> | 1.107 |
| ZZ-AgN <sub>1</sub> C <sub>3</sub> | 1.043 | ZZ-AgN <sub>2</sub> C <sub>2</sub> b | 1.019 | ZZ-AgN <sub>4</sub> | 0.797 |
| ZZ-CdN <sub>1</sub> C <sub>3</sub> | 0.736 | ZZ-CdN <sub>2</sub> C <sub>2</sub> b | 0.761 | ZZ-CdN <sub>4</sub> | 1.195 |
| ZZ-LaN <sub>1</sub> C <sub>3</sub> | 1.599 | ZZ-LaN <sub>2</sub> C <sub>2</sub> b | 1.585 | ZZ-LaN <sub>4</sub> | 2.649 |
| ZZ-HfN <sub>1</sub> C <sub>3</sub> | 3.119 | ZZ-HfN <sub>2</sub> C <sub>2</sub> b | 3.342 | ZZ-HfN <sub>4</sub> | 3.677 |
| ZZ-TaN <sub>1</sub> C <sub>3</sub> | 2.938 | ZZ-TaN <sub>2</sub> C <sub>2</sub> b | 1.809 | ZZ-TaN <sub>4</sub> | 2.001 |
| ZZ-WN <sub>1</sub> C <sub>3</sub>  | 1.874 | ZZ-WN <sub>2</sub> C <sub>2</sub> b  | 1.806 | ZZ-WN <sub>4</sub>  | 1.603 |
| ZZ-ReN <sub>1</sub> C <sub>3</sub> | 1.747 | ZZ-ReN <sub>2</sub> C <sub>2</sub> b | 0.636 | ZZ-ReN <sub>4</sub> | 0.889 |
| ZZ-OsN <sub>1</sub> C <sub>3</sub> | 1.003 | ZZ-OsN <sub>2</sub> C <sub>2</sub> b | 0.910 | ZZ-OsN <sub>4</sub> | 1.029 |
| ZZ-IrN <sub>1</sub> C <sub>3</sub> | 1.065 | ZZ-IrN <sub>2</sub> C <sub>2</sub> b | 1.081 | ZZ-IrN <sub>4</sub> | 0.460 |
| ZZ-PtN <sub>1</sub> C <sub>3</sub> | 0.553 | ZZ-PtN <sub>2</sub> C <sub>2</sub> b | 0.857 | ZZ-PtN <sub>4</sub> | 1.122 |
| ZZ-AuN <sub>1</sub> C <sub>3</sub> | 1.164 | ZZ-AuN <sub>2</sub> C <sub>2</sub> b | 1.162 | ZZ-AuN <sub>4</sub> | 0.928 |

**Table. S5** ORR overpotential  $\eta_{\text{model}}$  of catalysts of ZZ-MN<sub>x</sub>C<sub>y</sub> system predicted by the ML model, which using descriptors  $VEc$ ,  $DC$ ,  $I_1^*\chi$ ,  $P$ ,  $R_1$ ,  $R_2$ ,  $R_3$  and  $R_4$  as catalysts feature.

| Catalysts           | $\eta_{\text{model}}$ | Catalysts                          | $\eta_{\text{model}}$ | Catalysts                          | $\eta_{\text{model}}$ |
|---------------------|-----------------------|------------------------------------|-----------------------|------------------------------------|-----------------------|
| ZZ-ScC <sub>4</sub> | 2.041                 | ZZ-ScN <sub>2</sub> C <sub>2</sub> | 2.142                 | ZZ-ScN <sub>3</sub> C <sub>1</sub> | 2.529                 |
| ZZ-TiC <sub>4</sub> | 2.706                 | ZZ-TiN <sub>2</sub> C <sub>2</sub> | 3.104                 | ZZ-TiN <sub>3</sub> C <sub>1</sub> | 3.378                 |
| ZZ-VC <sub>4</sub>  | 2.957                 | ZZ-VN <sub>2</sub> C <sub>2</sub>  | 2.497                 | ZZ-VN <sub>3</sub> C <sub>1</sub>  | 2.280                 |
| ZZ-CrC <sub>4</sub> | 2.196                 | ZZ-CrN <sub>2</sub> C <sub>2</sub> | 1.588                 | ZZ-CrN <sub>3</sub> C <sub>1</sub> | 1.478                 |
| ZZ-MnC <sub>4</sub> | 1.804                 | ZZ-MnN <sub>2</sub> C <sub>2</sub> | 1.078                 | ZZ-MnN <sub>3</sub> C <sub>1</sub> | 1.031                 |
| ZZ-FeC <sub>4</sub> | 1.077                 | ZZ-FeN <sub>2</sub> C <sub>2</sub> | 0.869                 | ZZ-FeN <sub>3</sub> C <sub>1</sub> | 0.840                 |

|                                    |       |                                      |       |                                    |       |
|------------------------------------|-------|--------------------------------------|-------|------------------------------------|-------|
| ZZ-CoC <sub>4</sub>                | 0.860 | ZZ-CoN <sub>2</sub> C <sub>2</sub>   | 0.661 | ZZ-CoN <sub>3</sub> C <sub>1</sub> | 0.487 |
| ZZ-NiC <sub>4</sub>                | 0.501 | ZZ-NiN <sub>2</sub> C <sub>2</sub>   | 0.777 | ZZ-NiN <sub>3</sub> C <sub>1</sub> | 0.784 |
| ZZ-CuC <sub>4</sub>                | 1.045 | ZZ-CuN <sub>2</sub> C <sub>2</sub>   | 0.940 | ZZ-CuN <sub>3</sub> C <sub>1</sub> | 0.917 |
| ZZ-ZnC <sub>4</sub>                | 0.765 | ZZ-ZnN <sub>2</sub> C <sub>2</sub>   | 0.718 | ZZ-ZnN <sub>3</sub> C <sub>1</sub> | 0.752 |
| ZZ-YC <sub>4</sub>                 | 1.995 | ZZ-YN <sub>2</sub> C <sub>2</sub>    | 2.053 | ZZ-YN <sub>3</sub> C <sub>1</sub>  | 2.482 |
| ZZ-ZrC <sub>4</sub>                | 2.672 | ZZ-ZrN <sub>2</sub> C <sub>2</sub>   | 3.167 | ZZ-ZrN <sub>3</sub> C <sub>1</sub> | 3.570 |
| ZZ-NbC <sub>4</sub>                | 3.040 | ZZ-NbN <sub>2</sub> C <sub>2</sub>   | 3.016 | ZZ-NbN <sub>3</sub> C <sub>1</sub> | 2.254 |
| ZZ-MoC <sub>4</sub>                | 2.215 | ZZ-MoN <sub>2</sub> C <sub>2</sub>   | 1.646 | ZZ-MoN <sub>3</sub> C <sub>1</sub> | 1.489 |
| ZZ-TcC <sub>4</sub>                | 1.760 | ZZ-TcN <sub>2</sub> C <sub>2</sub>   | 0.952 | ZZ-TcN <sub>3</sub> C <sub>1</sub> | 0.916 |
| ZZ-RuC <sub>4</sub>                | 1.279 | ZZ-RuN <sub>2</sub> C <sub>2</sub>   | 0.771 | ZZ-RuN <sub>3</sub> C <sub>1</sub> | 0.680 |
| ZZ-RhC <sub>4</sub>                | 0.928 | ZZ-RhN <sub>2</sub> C <sub>2</sub>   | 0.848 | ZZ-RhN <sub>3</sub> C <sub>1</sub> | 0.566 |
| ZZ-PdC <sub>4</sub>                | 0.502 | ZZ-PdN <sub>2</sub> C <sub>2</sub>   | 0.897 | ZZ-PdN <sub>3</sub> C <sub>1</sub> | 1.074 |
| ZZ-AgC <sub>4</sub>                | 1.057 | ZZ-AgN <sub>2</sub> C <sub>2</sub>   | 0.996 | ZZ-AgN <sub>3</sub> C <sub>1</sub> | 0.926 |
| ZZ-CdC <sub>4</sub>                | 0.796 | ZZ-CdN <sub>2</sub> C <sub>2</sub>   | 0.734 | ZZ-CdN <sub>3</sub> C <sub>1</sub> | 0.900 |
| ZZ-LaC <sub>4</sub>                | 1.713 | ZZ-LaN <sub>2</sub> C <sub>2</sub>   | 1.643 | ZZ-LaN <sub>3</sub> C <sub>1</sub> | 2.063 |
| ZZ-HfC <sub>4</sub>                | 2.823 | ZZ-HfN <sub>2</sub> C <sub>2</sub>   | 3.425 | ZZ-HfN <sub>3</sub> C <sub>1</sub> | 3.765 |
| ZZ-TaC <sub>4</sub>                | 3.059 | ZZ-TaN <sub>2</sub> C <sub>2</sub>   | 1.936 | ZZ-TaN <sub>3</sub> C <sub>1</sub> | 2.015 |
| ZZ-WC <sub>4</sub>                 | 2.103 | ZZ-WN <sub>2</sub> C <sub>2</sub>    | 1.697 | ZZ-WN <sub>3</sub> C <sub>1</sub>  | 1.444 |
| ZZ-ReC <sub>4</sub>                | 1.860 | ZZ-ReN <sub>2</sub> C <sub>2</sub>   | 0.672 | ZZ-ReN <sub>3</sub> C <sub>1</sub> | 0.874 |
| ZZ-OsC <sub>4</sub>                | 1.194 | ZZ-OsN <sub>2</sub> C <sub>2</sub>   | 0.929 | ZZ-OsN <sub>3</sub> C <sub>1</sub> | 0.909 |
| ZZ-IrC <sub>4</sub>                | 1.140 | ZZ-IrN <sub>2</sub> C <sub>2</sub>   | 0.968 | ZZ-IrN <sub>3</sub> C <sub>1</sub> | 0.571 |
| ZZ-PtC <sub>4</sub>                | 0.586 | ZZ-PtN <sub>2</sub> C <sub>2</sub>   | 0.896 | ZZ-PtN <sub>3</sub> C <sub>1</sub> | 1.053 |
| ZZ-AuC <sub>4</sub>                | 1.205 | ZZ-AuN <sub>2</sub> C <sub>2</sub>   | 1.149 | ZZ-AuN <sub>3</sub> C <sub>1</sub> | 1.060 |
| ZZ-ScN <sub>1</sub> C <sub>3</sub> | 2.031 | ZZ-ScN <sub>2</sub> C <sub>2</sub> b | 2.238 | ZZ-ScN <sub>4</sub>                | 2.986 |
| ZZ-TiN <sub>1</sub> C <sub>3</sub> | 2.900 | ZZ-TiN <sub>2</sub> C <sub>2</sub> b | 3.102 | ZZ-TiN <sub>4</sub>                | 3.291 |
| ZZ-VN <sub>1</sub> C <sub>3</sub>  | 2.923 | ZZ-VN <sub>2</sub> C <sub>2</sub> b  | 2.577 | ZZ-VN <sub>4</sub>                 | 1.202 |
| ZZ-CrN <sub>1</sub> C <sub>3</sub> | 2.273 | ZZ-CrN <sub>2</sub> C <sub>2</sub> b | 1.606 | ZZ-CrN <sub>4</sub>                | 1.184 |
| ZZ-MnN <sub>1</sub> C <sub>3</sub> | 1.696 | ZZ-MnN <sub>2</sub> C <sub>2</sub> b | 1.196 | ZZ-MnN <sub>4</sub>                | 0.889 |

|                                    |       |                                      |       |                     |       |
|------------------------------------|-------|--------------------------------------|-------|---------------------|-------|
| ZZ-FeN <sub>1</sub> C <sub>3</sub> | 1.015 | ZZ-FeN <sub>2</sub> C <sub>2</sub> b | 0.878 | ZZ-FeN <sub>4</sub> | 0.715 |
| ZZ-CoN <sub>1</sub> C <sub>3</sub> | 0.766 | ZZ-CoN <sub>2</sub> C <sub>2</sub> b | 0.664 | ZZ-CoN <sub>4</sub> | 0.459 |
| ZZ-NiN <sub>1</sub> C <sub>3</sub> | 0.539 | ZZ-NiN <sub>2</sub> C <sub>2</sub> b | 0.777 | ZZ-NiN <sub>4</sub> | 0.901 |
| ZZ-CuN <sub>1</sub> C <sub>3</sub> | 1.002 | ZZ-CuN <sub>2</sub> C <sub>2</sub> b | 0.945 | ZZ-CuN <sub>4</sub> | 0.956 |
| ZZ-ZnN <sub>1</sub> C <sub>3</sub> | 0.748 | ZZ-ZnN <sub>2</sub> C <sub>2</sub> b | 0.784 | ZZ-ZnN <sub>4</sub> | 1.144 |
| ZZ-YN <sub>1</sub> C <sub>3</sub>  | 1.973 | ZZ-YN <sub>2</sub> C <sub>2</sub> b  | 2.160 | ZZ-YN <sub>4</sub>  | 2.937 |
| ZZ-ZrN <sub>1</sub> C <sub>3</sub> | 2.914 | ZZ-ZrN <sub>2</sub> C <sub>2</sub> b | 3.201 | ZZ-ZrN <sub>4</sub> | 3.548 |
| ZZ-NbN <sub>1</sub> C <sub>3</sub> | 3.096 | ZZ-NbN <sub>2</sub> C <sub>2</sub> b | 2.770 | ZZ-NbN <sub>4</sub> | 1.469 |
| ZZ-MoN <sub>1</sub> C <sub>3</sub> | 2.209 | ZZ-MoN <sub>2</sub> C <sub>2</sub> b | 1.603 | ZZ-MoN <sub>4</sub> | 1.368 |
| ZZ-TcN <sub>1</sub> C <sub>3</sub> | 1.656 | ZZ-TcN <sub>2</sub> C <sub>2</sub> b | 1.034 | ZZ-TcN <sub>4</sub> | 0.782 |
| ZZ-RuN <sub>1</sub> C <sub>3</sub> | 1.277 | ZZ-RuN <sub>2</sub> C <sub>2</sub> b | 0.679 | ZZ-RuN <sub>4</sub> | 0.844 |
| ZZ-RhN <sub>1</sub> C <sub>3</sub> | 0.905 | ZZ-RhN <sub>2</sub> C <sub>2</sub> b | 0.773 | ZZ-RhN <sub>4</sub> | 0.503 |
| ZZ-PdN <sub>1</sub> C <sub>3</sub> | 0.518 | ZZ-PdN <sub>2</sub> C <sub>2</sub> b | 0.898 | ZZ-PdN <sub>4</sub> | 1.132 |
| ZZ-AgN <sub>1</sub> C <sub>3</sub> | 1.036 | ZZ-AgN <sub>2</sub> C <sub>2</sub> b | 0.999 | ZZ-AgN <sub>4</sub> | 0.781 |
| ZZ-CdN <sub>1</sub> C <sub>3</sub> | 0.724 | ZZ-CdN <sub>2</sub> C <sub>2</sub> b | 0.825 | ZZ-CdN <sub>4</sub> | 1.100 |
| ZZ-LaN <sub>1</sub> C <sub>3</sub> | 1.624 | ZZ-LaN <sub>2</sub> C <sub>2</sub> b | 1.724 | ZZ-LaN <sub>4</sub> | 2.767 |
| ZZ-HfN <sub>1</sub> C <sub>3</sub> | 3.122 | ZZ-HfN <sub>2</sub> C <sub>2</sub> b | 3.485 | ZZ-HfN <sub>4</sub> | 3.818 |
| ZZ-TaN <sub>1</sub> C <sub>3</sub> | 2.912 | ZZ-TaN <sub>2</sub> C <sub>2</sub> b | 2.184 | ZZ-TaN <sub>4</sub> | 1.698 |
| ZZ-WN <sub>1</sub> C <sub>3</sub>  | 2.104 | ZZ-WN <sub>2</sub> C <sub>2</sub> b  | 1.611 | ZZ-WN <sub>4</sub>  | 1.429 |
| ZZ-ReN <sub>1</sub> C <sub>3</sub> | 1.731 | ZZ-ReN <sub>2</sub> C <sub>2</sub> b | 0.751 | ZZ-ReN <sub>4</sub> | 0.725 |
| ZZ-OsN <sub>1</sub> C <sub>3</sub> | 1.017 | ZZ-OsN <sub>2</sub> C <sub>2</sub> b | 0.927 | ZZ-OsN <sub>4</sub> | 0.961 |
| ZZ-IrN <sub>1</sub> C <sub>3</sub> | 1.061 | ZZ-IrN <sub>2</sub> C <sub>2</sub> b | 0.945 | ZZ-IrN <sub>4</sub> | 0.446 |
| ZZ-PtN <sub>1</sub> C <sub>3</sub> | 0.562 | ZZ-PtN <sub>2</sub> C <sub>2</sub> b | 0.898 | ZZ-PtN <sub>4</sub> | 1.107 |
| ZZ-AuN <sub>1</sub> C <sub>3</sub> | 1.185 | ZZ-AuN <sub>2</sub> C <sub>2</sub> b | 1.147 | ZZ-AuN <sub>4</sub> | 0.915 |

**Table. S6** catalysts with  $\eta_{\text{model}} \leq 0.8$  V in Table S5.

| <b>Catalysts</b> | <b><math>\eta_{\text{model}}</math></b> | <b>Catalysts</b> | <b><math>\eta_{\text{model}}</math></b> | <b>Catalysts</b> | <b><math>\eta_{\text{model}}</math></b> |
|------------------|-----------------------------------------|------------------|-----------------------------------------|------------------|-----------------------------------------|
|------------------|-----------------------------------------|------------------|-----------------------------------------|------------------|-----------------------------------------|

|                                      |       |                                      |       |                                      |       |
|--------------------------------------|-------|--------------------------------------|-------|--------------------------------------|-------|
| ZZ-CoN <sub>4</sub>                  | 0.459 | ZZ-ZnN <sub>2</sub> C <sub>2</sub>   | 0.718 | ZZ-CoN <sub>1</sub> C <sub>3</sub>   | 0.766 |
| ZZ-CoN <sub>3</sub> C <sub>1</sub>   | 0.487 | ZZ-CdN <sub>1</sub> C <sub>3</sub>   | 0.724 | ZZ-NiN <sub>2</sub> C <sub>2</sub> b | 0.777 |
| ZZ-NiC <sub>4</sub>                  | 0.500 | ZZ-ReN <sub>4</sub>                  | 0.725 | ZZ-NiN <sub>2</sub> C <sub>2</sub>   | 0.777 |
| ZZ-NiN <sub>1</sub> C <sub>3</sub>   | 0.539 | ZZ-CdN <sub>2</sub> C <sub>2</sub>   | 0.734 | ZZ-ZnN <sub>2</sub> C <sub>2</sub> b | 0.784 |
| ZZ-CoN <sub>2</sub> C <sub>2</sub>   | 0.661 | ZZ-ZnN <sub>1</sub> C <sub>3</sub>   | 0.748 | ZZ-NiN <sub>3</sub> C <sub>1</sub>   | 0.784 |
| ZZ-CoN <sub>2</sub> C <sub>2</sub> b | 0.664 | ZZ-ReN <sub>2</sub> C <sub>2</sub> b | 0.751 | ZZ-CdC <sub>4</sub>                  | 0.796 |
| ZZ-ReN <sub>2</sub> C <sub>2</sub>   | 0.672 | ZZ-ZnN <sub>3</sub> C <sub>1</sub>   | 0.752 | -                                    | -     |
| ZZ-FeN <sub>4</sub>                  | 0.715 | ZZ-ZnC <sub>4</sub>                  | 0.765 | -                                    | -     |

**Table. S7**  $\Delta G$  of each reaction step,  $\eta_{\text{DFT}}$  and  $\eta_{\text{model}}$  of catalysts of ZZ-MN<sub>x</sub>C<sub>y</sub> system with  $\eta_{\text{model}} \leq 0.7\text{V}$ .

| Catalysts                          | $\Delta G_1$ | $\Delta G_2$ | $\Delta G_3$ | $\Delta G_4$ | $\eta_{\text{DFT}}$ | $\eta_{\text{model}}$ |
|------------------------------------|--------------|--------------|--------------|--------------|---------------------|-----------------------|
| ZZ-NiC <sub>4</sub>                | -1.251       | 0.265        | 0.281        | 0.704        | 0.704               | 0.462                 |
| ZZ-CdN <sub>1</sub> C <sub>3</sub> | -1.211       | -0.720       | 1.216        | 0.716        | 1.216               | 0.724                 |
| ZZ-NiN <sub>1</sub> C <sub>3</sub> | -1.246       | 0.104        | 0.579        | 0.563        | 0.579               | 0.526                 |
| ZZ-CoN <sub>2</sub> C <sub>2</sub> | -0.490       | 0.785        | -0.077       | -0.218       | 0.785               | 0.661                 |
| ZZ-CoN <sub>3</sub> C <sub>1</sub> | -0.544       | 0.498        | 0.167        | -0.121       | 0.498               | 0.487                 |
| ZZ-CoN <sub>4</sub>                | -0.666       | 0.457        | 0.141        | 0.067        | 0.457               | 0.436                 |
| ZZ-FeN <sub>4</sub>                | -0.434       | 0.940        | -0.241       | -0.265       | 0.940               | 0.715                 |
